1 **Article**  
2 **Discoveries**

3  
4 **Title:** Synergistic binding of bHLH transcription factors to the promoter of the maize  
5 *NADP-ME* gene used in C<sub>4</sub> photosynthesis is based on an ancient code found in the  
6 ancestral C<sub>3</sub> state

7  
8  
9 **Authors:** Ana Rita Borba<sup>1,2</sup>, Tânia S. Serra<sup>1,2</sup>, Alicja Górska<sup>1,2</sup>, Paulo Gouveia<sup>1,2</sup>,  
10 André M. Cordeiro<sup>1,2</sup>, Ivan Reyna-Llorens<sup>3</sup>, Jana Kneřová<sup>3</sup>, Pedro M. Barros<sup>1</sup>, Isabel  
11 A. Abreu<sup>1,2</sup>, M. Margarida Oliveira<sup>1,2</sup>, Julian M. Hibberd<sup>\*,3</sup>, Nelson J.M. Saibo<sup>\*,1,2</sup>

12  
13 **Author information**

14 <sup>1</sup>Instituto de Tecnologia Química e Biológica António Xavier, Universidade Nova de  
15 Lisboa, 2780-157, Oeiras, Portugal.

16 <sup>2</sup>Instituto de Biologia Experimental e Tecnológica, 2780-157, Oeiras, Portugal.

17 <sup>3</sup>Department of Plant Sciences, Downing Street, University of Cambridge, Cambridge  
18 CB2 3EA, UK.

19  
20 **\*Corresponding authors:** email: [jmh65@cam.ac.uk](mailto:jmh65@cam.ac.uk); [saibo@itqb.unl.pt](mailto:saibo@itqb.unl.pt).

21 **Abstract**

22 C<sub>4</sub> photosynthesis has evolved repeatedly from the ancestral C<sub>3</sub> state to generate a  
23 carbon concentrating mechanism that increases photosynthetic efficiency. This  
24 specialised form of photosynthesis is particularly common in the PACMAD clade of  
25 grasses, and is used by many of the world's most productive crops. The C<sub>4</sub> cycle is  
26 accomplished through cell-type specific accumulation of enzymes but *cis*-elements  
27 and transcription factors controlling C<sub>4</sub> photosynthesis remain largely unknown. Using  
28 the *NADP-Malic Enzyme (NADP-ME)* gene as a model we aimed to better understand  
29 molecular mechanisms associated with the evolution of C<sub>4</sub> photosynthesis. Two basic  
30 Helix-Loop-Helix (bHLH) transcription factors, ZmbHLH128 and ZmbHLH129, were  
31 shown to bind the C<sub>4</sub> *NADP-ME* promoter from maize. These proteins form  
32 heterodimers and ZmbHLH129 impairs *trans*-activation by ZmbHLH128.  
33 Electrophoretic mobility shift assays indicate that a pair of *cis*-elements separated by  
34 a seven base pair spacer synergistically bind either ZmbHLH128 or ZmbHLH129. This  
35 pair of *cis*-elements is found in both C<sub>3</sub> and C<sub>4</sub> species of the PACMAD clade. Our  
36 analysis is consistent with this *cis*-element pair originating from a single motif present  
37 in the ancestral C<sub>3</sub> state. We conclude that C<sub>4</sub> photosynthesis has co-opted an ancient  
38 C<sub>3</sub> regulatory code built on G-box recognition by bHLH to regulate the *NADP-ME* gene.  
39 More broadly, our findings also contribute to the understanding of gene regulatory  
40 networks controlling C<sub>4</sub> photosynthesis.

41

42 **Key words:** basic Helix-Loop-Helix, *cis*-element evolution, C<sub>3</sub> and C<sub>4</sub> photosynthesis,  
43 NADP-Malic Enzyme, PACMAD grasses.

## 44 Introduction

45  $C_3$  plants inherited a carbon fixation system developed by photosynthetic  
46 bacteria, with atmospheric carbon dioxide ( $CO_2$ ) being incorporated into ribulose-1,5-  
47 bisphosphate (RuBP) by the enzyme Ribulose Bisphosphate Carboxylase/Oxygenase  
48 (RuBisCO) to form the three-carbon compound ( $C_3$ ) 3-phosphoglycerate (Calvin and  
49 Massini 1952). However, RuBisCO can also catalyse oxygenation of RuBP, which  
50 leads to the production of 2-phosphoglycolate, a compound that is toxic to the plant  
51 cell and needs to be detoxified through an energetically wasteful process called  
52 photorespiration (Bowes et al. 1971; Sharkey 1988; Sage 2004). The oxygenase  
53 reaction of RuBisCO becomes more common as temperature increases and so in  $C_3$   
54 plants photorespiration can reduce photosynthetic output by up to 30% (Ehleringer  
55 and Monson 1993). In environments such as the tropics where rates of  
56 photorespiration are high,  $C_4$  photosynthesis has evolved repeatedly from the  
57 ancestral  $C_3$  state (Lloyd and Farquhar 1994; Osborne and Beerling 2006).  
58 Phylogenetic studies estimate that the first transition from  $C_3$  to  $C_4$  occurred around  
59 30 million years ago (MYA) (Christin et al. 2008; Vicentini et al. 2008; Christin et al.  
60 2011). The ability of the  $C_4$  cycle to concentrate  $CO_2$  around RuBisCO limits  
61 oxygenation and so increases photosynthetic efficiency in conditions where  
62 photorespiration is enhanced (Hatch and Slack 1966; Maier et al. 2011; Christin and  
63 Osborne 2014; Lundgren and Christin 2016).

64 The evolution of  $C_4$  photosynthesis involved multiple modifications to leaf  
65 anatomy and biochemistry (Hatch 1987; Sage 2004). In most  $C_4$  plants, photosynthetic  
66 reactions are partitioned between two distinct cell types known as mesophyll (M) and  
67 bundle sheath (BS) cells (Langdale 2011). M and BS cells are arranged in concentric  
68 circles around veins in the so-called Kranz anatomy (Haberlandt 1904), which enables  
69  $CO_2$  pumping from M to BS where RuBisCO is specifically located. Atmospheric  $CO_2$   
70 is first converted to  $HCO_3^-$  by carbonic anhydrase (CA) and then combined with  
71 phosphoenolpyruvate (PEP) by PEP-carboxylase (PEPC) to produce oxaloacetate in  
72 the M cells. This four-carbon acid ( $C_4$ ) is subsequently converted into malate and/or  
73 aspartate that transport the fixed  $CO_2$  from M to BS cells (Kagawa and Hatch 1974;  
74 Hatch 1987). Three biochemical  $C_4$  subtypes are traditionally described based on the  
75 predominant type of  $C_4$  acid decarboxylase responsible for the  $CO_2$  release around  
76 RuBisCO in the BS: NADP-dependent Malic Enzyme (NADP-ME, e.g. *Zea mays*),  
77 NAD-dependent Malic Enzyme (NAD-ME, e.g. *Gynandropsis gynandra* formerly

78 designated *Cleome gynandra*) and phosphoenolpyruvate carboxykinase (PEPCK).  
79 However, recent reports suggest that only the NADP-ME and NAD-ME should be  
80 considered as distinct C<sub>4</sub> subtypes, which in response to environmental cues may  
81 involve a supplementary PEPCK cycle (Williams et al. 2012; Y. Wang et al. 2014; Rao  
82 and Dixon 2016).

83 The recruitment of multiple genes into C<sub>4</sub> photosynthesis involved both an  
84 increase in their transcript levels (Hibberd and Covshoff 2010) and also patterns of  
85 expression being modified from relatively constitutive in C<sub>3</sub> species (Maurino et al.  
86 1997; Penfield et al. 2004; Taylor et al. 2010; Brown et al. 2011; Maier et al. 2011) to  
87 M- or BS-specific in C<sub>4</sub> plants (Hibberd and Covshoff 2010). Therefore, considerable  
88 efforts have been made to identify the transcription factors (TF) and the *cis*-elements  
89 they recognise that are responsible for this light-dependent and cell-specific gene  
90 expression (Hibberd and Covshoff 2010). Various studies suggest that different  
91 transcriptional regulatory mechanisms have been adopted during C<sub>3</sub> to C<sub>4</sub> evolution.  
92 One is the acquisition of novel *cis*-elements in C<sub>4</sub> gene promoters that can be  
93 recognised by TFs already present in C<sub>3</sub> plants (Matsuoka et al. 1994; Ku et al. 1999;  
94 Nomura et al. 2000), and a second possibility is the acquisition of novel or modified  
95 TFs responsible for the recruitment of genes into the C<sub>4</sub> pathway through *cis*-elements  
96 that pre-exist in C<sub>3</sub> plants (Patel et al. 2006; Brown et al. 2011; Kajala et al. 2012).

97 A small number of *cis*-elements found in different gene regions have been shown  
98 to be sufficient for the M- or BS-specific expression of C<sub>4</sub> genes. For example, a 41  
99 base pair (bp) Mesophyll Expression Module 1 (MEM1) *cis*-element was identified  
100 from the *PEPC* promoter of C<sub>4</sub> *Flaveria trinervia* and shown to be necessary and  
101 sufficient for M cell-specific accumulation of *PEPC* transcripts in C<sub>4</sub> *Flaveria* species  
102 (Gowik et al. 2004). A MEM1-like *cis*-element has also been found in the C<sub>4</sub> carbonic  
103 anhydrase (*CA3*) promoter of *Flaveria bidentis* and shown to drive M cell-specific  
104 expression (Gowik et al. 2016). A second *cis*-element named MEM2 and consisting of  
105 9 bp from untranslated regions has also been shown to be capable of directing M-  
106 specificity in C<sub>4</sub> *G. gynandra* (Kajala et al. 2012; Williams et al. 2016). Lastly, in the  
107 case of the *NAD-ME* gene from C<sub>4</sub> *G. gynandra* a region from the coding sequence  
108 generates BS-specificity (Brown et al. 2011). In contrast to these insights into *cis*-  
109 elements that control cell-specific expression in the C<sub>4</sub> leaf, no TFs recognising these  
110 *cis*-elements have yet been identified.

111 To address this gap in our understanding, a bottom-up approach was initiated in  
112 attempt to identify TFs that regulate the important maize gene *ZmC<sub>4</sub>-NADP-ME*  
113 (GRMZM2G085019) that encodes the Malic Enzyme responsible for releasing CO<sub>2</sub> in  
114 the BS cells. Using Yeast One-Hybrid two maize TFs belonging to the superfamily of  
115 basic Helix-Loop-Helix (bHLH), ZmbHLH128 and ZmbHLH129, were identified and  
116 functionally characterized. In addition, these TFs bind two *cis*-elements synergistically.  
117 Analysis of the *cis*-elements in the *NADP-ME* promoters of BEP and PACMAD grass  
118 species indicated that this regulation is likely derived from an ancestral G-box that is  
119 present in C<sub>3</sub> species.

## 120 Results

### 121 **ZmbHLH128 and ZmbHLH129 homeologs bind FAR1/FHY3 Binding Site *cis*-** 122 **elements in the *ZmC<sub>4</sub>-NADP-ME* promoter**

123 To identify TFs that interact with the *ZmC<sub>4</sub>-NADP-ME* gene (GRMZM2G085019),  
124 we studied the promoter region comprising 1982 base pairs (bp) upstream of the  
125 translational start site. This region was divided into six overlapping fragments ranging  
126 from 235 to 482 bp in length (supplementary table S1) and used in Yeast One-Hybrid  
127 (Y1H). Each fragment was used to generate one yeast bait strain that was then used  
128 to screen a maize cDNA expression library. After screening at least 1.3 million colonies  
129 for each region of the promoter, two maize bHLH TFs known as ZmbHLH128 and  
130 ZmbHLH129 were identified. Both of these TFs bind the promoter between base pairs  
131 -389 and -154 in relation to the predicted translational start site of *ZmC<sub>4</sub>-NADP-ME*  
132 (fig. 1A). These interactions were confirmed by re-transforming yeast bait strains  
133 harbouring each of the six sections of the promoter with cDNAs encoding ZmbHLH128  
134 and ZmbHLH129. Consistent with the initial findings, ZmbHLH128 and ZmbHLH129  
135 only activated expression of the *HIS3* reporter when transformed into yeast containing  
136 fragment -389 to -154 bp upstream of *ZmC<sub>4</sub>-NADP-ME* (fig. 1B, supplementary fig.  
137 S1).

138 ZmbHLH128 and ZmbHLH129 possess a bHLH domain followed by a  
139 contiguous leucine zipper (ZIP) motif (fig. 1C). This bHLH domain is highly conserved  
140 between both ZmbHLHs and consists of 61 amino acids that can be separated into  
141 two functionally distinct regions. The first is a basic region located at the N-terminal  
142 end of the bHLH domain and is involved in DNA binding, and the second is a Helix-  
143 Loop-Helix region mediating dimerization towards the carboxy-terminus (fig. 1C)  
144 (Murre et al. 1989; Toledo-Ortiz et al. 2003). ZmbHLH128 and ZmbHLH129 share  
145 91% amino acid identity (fig. 1C) and they are encoded by homeolog genes located in  
146 syntenic regions of maize chromosomes 4 and 5 (fig. 1D, supplementary table S2).

147 Although ZmbHLH128 and ZmbHLH129 both possess three amino acids  
148 involved in G-box binding (K9, E13, and R17) (Massari and Murre 2000; Li et al.  
149 2006), this family of TFs has also been shown to bind to N-box (5'-CACGCG-3'), N-  
150 box B (5'-CACNAG-3') and FBS (FAR1/FHY3 Binding Site, 5'-CACGCGC-3') motifs  
151 (Sasai et al. 1992; Ohsako et al. 1994; Fisher and Caudy 1998; Kim et al. 2016).  
152 Therefore, the *ZmC<sub>4</sub>-NADP-ME* promoter was assessed for additional *cis*-elements to  
153 which ZmbHLH128 and ZmbHLH129 might bind. A total of eight such *cis*-elements

154 were found, consisting of two N-boxes B, two N-boxes, one G-box, two FBSs and one  
155 E-box (fig. 2A). Electrophoretic Mobility Shift Assays (EMSA) were used to test  
156 whether ZmbHLH128 and ZmbHLH129 were able to interact with each of these *cis*-  
157 elements *in vitro* (fig. 2B and C). Consistent with the Y1H findings, EMSA showed that  
158 recombinant Trx::ZmbHLH128 and Trx::ZmbHLH129 proteins caused an uplift of  
159 radiolabeled probes containing FBS *cis*-elements (probes 6, 7, and 6+7) (fig. 2C),  
160 positioned between nucleotides -389 and -154 in relation to the predicted translational  
161 start site (see fig. 1A). ZmbHLH128 also showed weak binding to probe 3 that  
162 contained a N-box *cis*-element that was not bound by ZmbHLH128 or ZmbHLH129 in  
163 Y1H (see fig. 1B), and signal intensity was similar to that observed from probe 7 (fig.  
164 2C). It is possible that relatively weak binding to probe 7 is due to it being three  
165 nucleotides-shorter than the other probes (fig. 2B). Trx alone and OsPIF14 (a bHLH  
166 known to bind the N-box motif (Cordeiro et al. 2016)) were used as negative controls  
167 (fig. 2C). The two FBS motifs, in probe 6+7, are separated by a short 7 bp spacer  
168 sequence and are found in opposite orientations (fig. 2B). The increase in band  
169 intensities detected when both *cis*-elements were combined (fig. 2C) suggests that  
170 they may function synergistically. Overall, these data indicate that ZmbHLH128 and  
171 ZmbHLH129 target 21bp of DNA sequence (7bp FBS, 7bp spacer, and 7bp FBS).

172

### 173 **ZmbHLH128 and ZmbHLH129 form both homo- and heterodimers and** 174 **ZmbHLH129 impairs *trans*-activation by ZmbHLH128**

175 Because ZmbHLH128 and ZmbHLH129 bind the FBS *cis*-elements in close  
176 proximity but also possess domains mediating protein dimerization, we next  
177 investigated whether these proteins form homo- and/or heterodimers. *In vitro*, the  
178 recombinant Trx::ZmbHLH128 and Trx::ZmbHLH129 proteins formed homodimers  
179 (fig. 3A). To confirm this interaction *in vivo*, as well as to test for heterodimerization,  
180 Bimolecular Fluorescence Complementation Assays (BiFC) in maize protoplasts were  
181 performed. Whilst negative controls produced no YFP fluorescence, ZmbHLH128 and  
182 ZmbHLH129 formed both homo- and heterodimers (fig. 3B). With the exception of  
183 ZmbHLH129 homodimers whose location extended to the cytoplasm and plasma  
184 membrane, in each case YFP signal was specifically localised to the nucleus (fig. 3B).  
185 Nuclear localisation of these ZmbHLH proteins supports their roles as transcriptional  
186 regulators.



187 To test the capacity of ZmbHLH128 and ZmbHLH129 to regulate transcription,  
188 transient expression assays were performed in leaves of *Nicotiana benthamiana*. The  
189 *GUS* reporter gene driven by the fragment of *pZmC<sub>4</sub>-NADP-ME* to which ZmbHLH128  
190 and ZmbHLH129 bind was used as reporter, whilst the full-length *ZmbHLH128* and  
191 *ZmbHLH129* CDS sequences driven by the constitutive *CaMV35S* promoter were  
192 used as effectors (fig. 4A). Co-infiltration of this reporter with the ZmbHLH128 effector  
193 resulted in an increase in *GUS* activity, indicating that ZmbHLH128 can act as a  
194 transcriptional activator (fig. 4B). In contrast, ZmbHLH129 showed no intrinsic *trans*-  
195 activation activity (fig. 4C). In order to test whether the ZmbHLH128-ZmbHLH129  
196 heterodimers had a different *trans*-activation activity from ZmbHLH128 or  
197 ZmbHLH129 homodimers, leaves were co-infiltrated with the reporter and both  
198 effectors simultaneously. Interestingly, the *trans*-activation activity observed for the  
199 ZmbHLH128 alone (fig. 4B) was lost when this TF was co-expressed with its homeolog  
200 ZmbHLH129 (fig. 4D).

201

### 202 **The G-box-based *cis*-element pair recognised by ZmbHLH128 and ZmbHLH129** 203 **in *NADP-ME* promoters operates synergistically**

204 To understand whether the two FBS *cis*-elements identified in the promoter of  
205 *ZmC<sub>4</sub>-NADP-ME* (see fig. 2) are associated with the evolution of C<sub>4</sub> photosynthesis,  
206 we investigated whether they are conserved in promoters of other *NADP-MEs* from C<sub>3</sub>  
207 and C<sub>4</sub> grass species. Three C<sub>3</sub> species (*Dichanthelium oligosanthes*, *Oryza sativa*  
208 and *Brachypodium distachyon*) and three C<sub>4</sub> species (*Zea mays*, *Sorghum bicolor* and  
209 *Setaria italica*) were assessed (fig. 5A). Within the C<sub>4</sub> species, *Zea mays* and *Sorghum*  
210 *bicolor* possess two plastidic *NADP-ME* isoforms: one that is used in C<sub>4</sub>  
211 photosynthesis (C<sub>4</sub>-*NADP-ME*, GRMZM2G085019 and Sobic.003g036200) and a  
212 second one not involved in the C<sub>4</sub> cycle (*nonC<sub>4</sub>-NADP-ME*, GRMZM2G122479 and  
213 Sobic.009g108700). In contrast, *S. italica* possesses only one plastidic *NADP-ME*  
214 isoform that is used in the C<sub>4</sub> cycle (C<sub>4</sub>-*NADP-ME*, Si000645) (Alvarez et al. 2013).

215 Although in C<sub>3</sub> *B. distachyon* no homologous *cis*-elements to the FBSs in the  
216 *ZmC<sub>4</sub>-NADP-ME* promoter were detected, in *O. sativa* one G-box was found in the  
217 same position as FBS 1 from *Z. mays*. Moreover, in the other promoters, *cis*-elements  
218 that can bind bHLH proteins were present in pairs (fig. 5A). In both the C<sub>3</sub> and C<sub>4</sub>  
219 grasses these *cis*-element pairs flank a spacer that is highly conserved in sequence  
220 and length (7 to 9 bp) (fig. 5A). The C<sub>4</sub>-*NADP-ME* promoters from *Z. mays* and *S.*



221 *bicolor* share a common mutation in the third nucleotide position of the alignment  
222 (A→G) (fig. 5A). Two additional mutations are specific to *Z. mays* (the first and last  
223 nucleotides of FBS 1 and FBS 2, respectively), whilst one is *S. bicolor*-specific (C→T  
224 at the fourth position) (fig. 5A). It is possible that mutations unique to *Z. mays* or *S.*  
225 *bicolor* are neutral and the main impact on *C<sub>4</sub>-NADP-ME* gene expression is due to  
226 mutation in the third nucleotide in the common ancestor of *Z. mays* and *S. bicolor*.  
227 Alternatively, it is also possible that both this mutation in the last common ancestor  
228 and species-specific modifications impacted on gene expression of *C<sub>4</sub>-NADP-ME*.

229 To test if ZmbHLH128 and ZmbHLH129 bind the *cis*-elements identified from  
230 these additional species EMSA was performed on each *cis*-element separately as well  
231 as the *cis*-element pairs found in each *NADP-ME* promoter (fig. 5B and C,  
232 supplementary table S3). ZmbHLH128 and ZmbHLH129 showed low binding affinity  
233 for the single G-box identified in the *O. sativa* promoter (probe 13) and binding affinity  
234 was not increased by mutating the G-box to a canonical N-box (probe m13) (fig. 5B  
235 and C). This low binding affinity behaviour for single G-box *cis*-elements was  
236 consistent for all the *NADP-ME* promoters containing G-boxes (probes 5, 7, 9 and 11)  
237 (fig. 5B and C). Although both ZmbHLHs did not show binding affinity for the additional  
238 N-boxes or N-box-like alone (probes 6, 8, 10 and 12) (fig. 5B and C), when these  
239 additional motifs were acquired and formed a pair with the ancestral G-box, binding  
240 affinity was increased (probes 5+6, 7+8, 9+10 and 11+12) and led to an increased  
241 uplift compared with the G-boxes alone (probes 5, 7, 9 and 11) (fig. 5B and C). Given  
242 the similar length of probes 1, 2, 1+2, 5, 7, 9 and 11 (24 to 30 bp) (supplementary  
243 table S3), it is possible that this difference in migration of ZmbHLH-probe complexes  
244 results from the binding of bHLH to G-boxes in a lower oligomeric state  
245 (supplementary fig. S2), which based on the literature must be dimers (De Masi et al.  
246 2011). Strong binding of *cis*-element pairs was also observed when the ancestral G-  
247 box evolved into either FBS or FeRE1 elements found in *C<sub>4</sub>* *Z. mays* and *S. bicolor*  
248 (probes 1+2 and 3+4) (fig. 5B and C). In the *C<sub>4</sub>* *Z. mays* promoter, both ZmbHLHs  
249 showed binding affinity for single FBS *cis*-elements (probes 1 and 2) in the highest  
250 oligomeric state (fig. 5B and C, supplementary fig. S2).

251 Since ZmbHLH128 and ZmbHLH129 showed weak binding to single *cis*-  
252 elements, we tested their binding by mutating these *cis*-elements in probes with the  
253 pairs (supplementary fig. S3). For each pair, three mutant probes were designed: two  
254 in which the two *cis*-elements were mutated individually (keeping one *cis*-element wild-

255 type) and one in which both *cis*-elements were mutated simultaneously  
256 (supplementary table S3). Competition experiments were performed using  
257 radiolabeled wild-type probes (with *cis*-element pairs) and 200- to 400-fold excess of  
258 unlabeled wild-type and mutant probes (supplementary fig. S3). Binding of both  
259 ZmbHLHs to the labeled wild-type probes could be efficiently out-competed by  
260 unlabeled wild-type and mutant probes in which the following *cis*-elements were not  
261 mutated: FBS 1 (in *Z. mays* *C<sub>4</sub>-NADP-ME*, probe 1+m2-A, supplementary fig. S3A);  
262 FBS 2 (in *Z. mays* *C<sub>4</sub>-NADP-ME*, probe m1+2-B, supplementary fig. S3A); N-box (in  
263 *S. bicolor* *C<sub>4</sub>-NADP-ME*, probe m3+4-E, supplementary fig. S3B); and G-box (in *S.*  
264 *italica* *C<sub>4</sub>-NADP-ME*, probe 5+m6-G, supplementary fig. S3C; *Z. mays nonC<sub>4</sub>-NADP-*  
265 *ME*, probe 7+m8-J, supplementary fig. S3D; *S. bicolor nonC<sub>4</sub>-NADP-ME*, probe  
266 9+m10-M, supplementary fig. S3E; and *D. oligosanthos* *C<sub>3</sub>-NADP-ME*, probe  
267 11+m12-P, supplementary fig. S3F). These EMSA competition experiments thus  
268 confirmed binding of ZmbHLH128 and ZmbHLH129 to the *cis*-elements described  
269 above. Taken together, the results indicate that a second *cis*-element recognised by  
270 bHLH TFs is acquired in the promoters of genes encoding plastidic NADP-ME and  
271 that each *cis*-element pair operates synergistically to allow interaction with either  
272 ZmbHLH128 or ZmbHLH129 in *C<sub>3</sub>* and *C<sub>4</sub>* grasses (fig. 5, supplementary fig. S2 and  
273 S3).

274 Given the binding affinity *in vitro* of ZmbHLH128 and ZmbHLH129 to the G-box  
275 in the *ZmnonC<sub>4</sub>-NADP-ME* promoter (probes 7 and 7+8, fig. 5C), we tested their  
276 binding ability *in planta*. Transient expression assays were performed in leaves of *N.*  
277 *benthamiana* co-infiltrated with *GUS* reporter gene driven by a *ZmnonC<sub>4</sub>-NADP-ME*  
278 promoter fragment containing the *cis*-element pair G- and N-box-like (-368 to -143 bp)  
279 and the effector constructs ZmbHLH128 and ZmbHLH129 (supplementary fig. S4A).  
280 Compared with the reporter alone, co-infiltration of *ZmnonC<sub>4</sub>-NADP-ME* reporter and  
281 the ZmbHLH128 and ZmbHLH129 effectors did not impact on *GUS* activity in tobacco  
282 system (supplementary fig. S4B-D). These results suggest that although ZmbHLH128  
283 on its own binds both the *ZmC<sub>4</sub>-NADP-ME* and *ZmnonC<sub>4</sub>-NADP-ME* promoters *in vitro*  
284 (probes 1, 2, 1+2, 7 and 7+8, fig. 5B and C), this might not be the case *in planta*  
285 (supplementary fig. S4).

286

287 **Acquisition of N-box-derived *cis*-elements in *NADP-ME* promoters facilitates**  
288 **ZmbHLH128 and ZmbHLH129 binding in PACMAD grasses**

289 Phylogenetic analysis of the genes encoding C<sub>3</sub> and C<sub>4</sub> plastidic NADP-MEs  
290 reflects previously reported grass species phylogeny (fig.6A) (Grass Phylogeny  
291 Working Group II 2012). It inferred two main clades: one formed by C<sub>3</sub> BEP species  
292 (*B. distachyon* and *O. sativa*) and a second formed by C<sub>3</sub> (*D. oligoanthes*) and C<sub>4</sub>  
293 PACMAD species (*S. italica*, *S. bicolor* and *Z. mays*) (fig.6A).

294 Based on the observed nucleotide modifications in *cis*-elements recognised by  
295 bHLH TFs, we propose a model relating to the recruitment of *NADP-ME* into C<sub>4</sub>  
296 photosynthesis in grasses (fig. 6B). This proposes that an ancestral G-box found in  
297 the *NADP-ME* promoter from C<sub>3</sub> BEP *O. sativa* was conserved throughout C<sub>3</sub> to C<sub>4</sub>  
298 evolution and is shared by different C<sub>3</sub> and C<sub>4</sub> grass lineages. However, in the  
299 PACMAD group a second *cis*-element recognised by bHLH was acquired such that  
300 the *NADP-ME* gene from the C<sub>3</sub> species *D. oligoanthes* and genes encoding *nonC*<sub>4</sub>-  
301 *NADP-ME* from C<sub>4</sub> *S. bicolor* and *Z. mays* all contain a G- and N-box/N-box-like pair.  
302 In C<sub>4</sub> *S. italica* this *cis*-code has been retained in the C<sub>4</sub>-*NADP-ME*, but in *S. bicolor*  
303 and *Z. mays* the original G-box has evolved to become either a FeRE1 or a FBS  
304 element, respectively (fig. 6B). Overall, these results suggest that the acquisition of N-  
305 box-derived *cis*-elements may have facilitated ZmbHLH128 and ZmbHLH129 binding  
306 to promoters of genes encoding plastidic NADP-ME in the PACMAD clade.

## 307 Discussion

### 308 **ZmbHLH128 and ZmbHLH129 homeologs interact with maize C<sub>4</sub>- and nonC<sub>4</sub>-** 309 **NADP-ME promoters *in vitro* showing different *trans*-activation activity *in planta***

310 In this study, we showed that ZmbHLH128 and ZmbHLH129 form a maize  
311 homeolog pair resulting from the recent maize whole genome duplication (WGD) event  
312 that occurred 5-12 million years ago. This WGD occurred ~25 million years after C<sub>4</sub>  
313 photosynthesis evolved in the Chloridoideae subfamily of the PACMAD clade (Christin  
314 et al. 2008; Christin et al. 2011). As the length of exons 1 and 2 and the total number  
315 of amino acids in the mature protein of ZmbHLH128 are more similar to sorghum  
316 ortholog SbbHLH66 (supplementary fig. S5), we propose that ZmbHLH129 has  
317 diverged more from the ancestral gene. Both of these TFs bind two FBS *cis*-elements  
318 that are in close proximity in the maize C<sub>4</sub>-NADP-ME (GRMZM2G085019) promoter.  
319 Although ZmbHLH128 has been predicted *in silico* to regulate C<sub>4</sub> photosynthesis (L.  
320 Wang et al. 2014), as far as we are aware, this is the first report of its functional  
321 characterization. ZmbHLH128 alone activates *ZmC<sub>4</sub>-NADP-ME* gene expression,  
322 whilst ZmbHLH129 alone shows no *trans*-activation activity on this promoter. As the  
323 duplication event that generated ZmbHLH129 took place after the evolution of C<sub>4</sub>  
324 photosynthesis, it seems possible that this gene is not required for C<sub>4</sub> photosynthesis.  
325 ZmbHLH128 and ZmbHLH129 form heterodimers and despite ZmbHLH128 activating  
326 the expression of *ZmC<sub>4</sub>-NADP-ME* its regulatory activity is impaired by its homeolog  
327 ZmbHLH129. To explain this impairment, we hypothesise different scenarios that may  
328 occur *in vivo*: either ZmbHLH128 and ZmbHLH129 act as heterodimers and  
329 ZmbHLH128 loses its DNA binding activity when combined with ZmbHLH129 or they  
330 act as homodimers and compete directly for the same FBSs, towards which  
331 ZmbHLH129 has a higher binding affinity. The former scenario has been described for  
332 bZIP TFs from *Arabidopsis*, where bZIP63 has negative effects on the formation of  
333 bZIP1-DNA complexes probably due to conformational differences between bZIP1  
334 homodimer and bZIP1-bZIP63 heterodimers (Kang et al. 2010). The latter scenario  
335 has been reported for the maize Dof1 and Dof2 TFs. Dof1 is a transcriptional activator  
336 of light-regulated genes in leaves, however, in stems and roots, this TF is not able to  
337 regulate those genes since the repressor Dof2 is expressed there and blocks Dof-  
338 specific *cis*-elements (Yanagisawa and Sheen 1998).

339 In addition to the capacity of ZmbHLH128 and ZmbHLH129 to interact with FBSs  
340 found in the maize C<sub>4</sub>-NADP-ME promoter, both ZmbHLHs were shown to bind *in vitro*

341 to the promoter of maize *nonC<sub>4</sub>-NADP-ME* (GRMZM2G122479) that possesses the  
342 *cis*-element pair G- and N-box-like. *In planta*, however, ZmbHLH128 and ZmbHLH129  
343 showed no *trans*-activation activity on this promoter. It is well known that primary DNA  
344 sequence and its structural properties are determinants of DNA binding specificity *in*  
345 *vivo* (Rohs et al. 2009) and so it is possible that both ZmbHLHs display increased *in*  
346 *vivo* binding specificity for the FBS pair in the *ZmC<sub>4</sub>-NADP-ME* promoter than for the  
347 G- and N-box-like pair in the *ZmnonC<sub>4</sub>-NADP-ME* promoter. Therefore, ZmbHLH128  
348 seems to affect the level of expression of *NADP-ME* as it activates the *ZmC<sub>4</sub>-NADP-*  
349 *ME* promoter through the pair formed by two FBSs but the same trend was not  
350 observed for the *ZmnonC<sub>4</sub>-NADP-ME* promoter with the G- and N-box pair.  
351 Additionally, we hypothesise that these modifications of promoter sequences may also  
352 affect light/circadian regulation of the *ZmC<sub>4</sub>-NADP-ME* gene as FBS *cis*-elements  
353 have been described in promoters of circadian-clock-regulated and light-responsive  
354 genes (Lin et al. 2007; Li et al. 2011; Kim et al. 2016). The mutation of two close FBSs  
355 in the promoter of the circadian-clock gene EARLY FLOWERING 4 (*ELF4*) proved to  
356 be sufficient to abolish its rhythmic expression (Li et al. 2011). More broadly, our  
357 findings also contribute to the understanding of gene regulatory networks controlling  
358 C<sub>4</sub> photosynthesis.

359

### 360 **The G-box-based *cis*-element pair present in *NADP-ME* promoters** 361 **synergistically bind either ZmbHLH128 or ZmbHLH129**

362 We identified a *cis*-element pair recognised by bHLH that occupy homologous  
363 positions in *NADP-ME* promoters from C<sub>3</sub> and C<sub>4</sub> grasses. These *cis*-elements flank a  
364 short spacer and operate synergistically to facilitate interaction with ZmbHLH128 and  
365 ZmbHLH129. We suggest a mechanism by which these TFs may be recruited to the  
366 *cis*-elements associated with C<sub>4</sub> photosynthesis. We propose that one *cis*-element is  
367 sufficient to recruit a bHLH homodimer (G-box) or tetramer (N-box or FBS in promoters  
368 where the ancestral G-box is no longer present), however, the presence of a second  
369 *cis*-element in the vicinity increases bHLH binding affinity (supplementary fig. S2). It is  
370 possible that both *cis*-elements are brought together through the interaction with a  
371 bHLH tetramer formed by two dimers, which may involve DNA bending  
372 (supplementary fig. S2). Therefore, this *cis*-element pair could operate synergistically  
373 to confer stabilisation of bHLH binding. This mechanism of TF-DNA assembly has  
374 previously been proposed for MADS-domain TFs that can bind two nearby CArG



375 boxes through DNA looping and formation of tetrameric complexes (Theissen 2001;  
376 Theissen and Saedler 2001; Melzer and Verelst 2009; Smaczniak et al. 2012;  
377 Smaczniak et al. 2017). In this case, and consistent with our results, MADS-domain  
378 TFs were found to bind single CArG boxes either as dimers or tetramers, however,  
379 when their target gene promoters contain CArG box pairs they bind as tetramers  
380 (Smaczniak et al. 2012). It has been proposed that the probability of DNA loop  
381 formation increases with shorter distances between *cis*-elements due to the low elastic  
382 bending energy required to bring the protein dimers together (Agrawal et al. 2008).  
383 Interestingly, in all *NADP-ME* promoters assessed in this study except rice and  
384 *Brachypodium* the two *cis*-elements were found to be in close proximity, which may  
385 encourage DNA looping. In addition to the spacer length, its sequence appears highly  
386 conserved. This is consistent with evidence suggesting that nucleotides outside core  
387 *cis*-elements affect TF binding specificity by providing genomic context and influencing  
388 three-dimensional structure (Atchley et al. 1999; Martínez-García et al. 2000; Grove  
389 et al. 2009; Gordân et al. 2013). For example, Cbf1 and Tye7 are yeast bHLHs that  
390 show preference for a subset of G-boxes present throughout the yeast genome  
391 (Gordân et al. 2013). These differences in binding preferences were observed not just  
392 *in vivo* but also *in vitro* and so DNA sequences flanking core G-boxes were found to  
393 explain this differential bHLH-G-box binding (Gordân et al. 2013).

394 The mechanism proposed here for how bHLH TFs interact with their target *cis*-  
395 elements suggests that these DNA sequences are not randomly arranged in gene  
396 promoters and may affect how *cis*-element specificity is achieved. Indeed, in some  
397 promoters bound by bHLH TFs two or more *cis*-elements were found to be clustered.  
398 For example, two overlapping FBSs were reported in the 400 base pairs upstream of  
399 the translational start site of the gene encoding ELF4 (Li et al. 2011). Also, pairs of G-  
400 and N-boxes were found to be highly enriched in promoters targeted by the bHLH PIF1  
401 (Kim et al. 2016). It is possible that multiple *cis*-elements serve to recruit additional  
402 TFs for *in vivo* cooperative binding.

403

#### 404 **C<sub>4</sub> photosynthesis co-opted an ancient C<sub>3</sub> *cis*-regulatory code built on G-box** 405 **recognition by bHLH transcription factors**

406 Finally, from this work we propose a model that summarises how molecular  
407 evolution of *cis*-elements recognised by bHLHs may relate to the recruitment of *NADP*-  
408 *ME* into C<sub>4</sub> photosynthesis. C<sub>4</sub> photosynthesis is an excellent example of convergent

409 evolution (Sage et al. 2011; Christin et al. 2013) as it has evolved independently over  
410 60 times in angiosperms (Sage et al. 2011; Sage 2016) and at least 22 times in  
411 grasses (Grass Phylogeny Working Group II 2012). How this repeated evolution has  
412 come about is not fully understood. Our model contributes to our understanding of  $C_4$   
413 evolution and is based on the following findings: first, in rice, which belongs to the BEP  
414 clade that contains no  $C_4$  species, only one copy of a G-box was present in the *NADP-*  
415 *ME* promoter. In contrast, *cis*-element pairs recognised by ZmbHLH128 and  
416 ZmbHLH129 in *NADP-ME* promoters seem to be common in the PACMAD clade that  
417 contains many independent  $C_4$  lineages. For example, in the PACMAD grasses a G-  
418 and N-box pair was identified in  $C_3$  *D. oligosanthos* (Do024386) and appears to be  
419 reasonably conserved in  $C_4$  species in this group. However, in the case of the  $C_4$ -  
420 *NADP-MEs* from *S. bicolor* and *Z. mays* (Sobic.003g036200 and GRMZM2G085019)  
421 these elements have diversified. Both of these grass species belong to the  $C_4$  lineage  
422 Andropogoneae in which the plastidic *NADP-ME* isoform that is used in  $C_4$   
423 photosynthesis ( $C_4$ -*NADP-ME*) evolved by duplication from an ancestral plastidic  
424 *NADP-ME* that still exists and is not involved in the  $C_4$  cycle (*nonC*<sub>4</sub>-*NADP-ME*,  
425 Sobic.009g108700 and GRMZM2G122479) (Tausta et al. 2002; Maier et al. 2011;  
426 Alvarez et al. 2013). In contrast,  $C_4$  *S. italica* together with  $C_3$  *D. oligosanthos* belong  
427 to the grass lineage Paniceae in which only one plastidic *NADP-ME* isoform is known  
428 to exist (Si000645 and Do024386) (Alvarez et al. 2013; Emms et al. 2016).  
429 Surprisingly, the *cis*-element pair identified in the  $C_4$ -*NADP-ME* promoter from *S.*  
430 *italica* (G- and N-box) was found to be closer to those occurring in the  $C_3$  and *nonC*<sub>4</sub>-  
431 *NADP-ME* promoters from *D. oligosanthos*, *S. bicolor*, and *Z. mays* (G- and N-box/N-  
432 box-like) than to those occurring in the  $C_4$ -*NADP-ME* promoters from *S. bicolor* and *Z.*  
433 *mays* (FeRE1 and N-box or FBS and FBS, respectively). A similar trend has previously  
434 been observed (Alvarez et al. 2013) and may be explained by the independent  
435 evolutionary origin of  $C_4$  photosynthesis in grass lineages formed by *S. italica*  
436 (Paniceae) or *S. bicolor/Z. mays* (Andropogoneae).

437 Taken together, our findings suggest that an ancestral G-box in combination with  
438 N-box-derived *cis*-elements form the basis of the synergistic binding of either  
439 ZmbHLH128 or ZmbHLH129 to *NADP-ME* promoters from PACMAD grasses.  
440 Nucleotide diversity in *cis*-elements recognised by bHLH TFs has been suggested as  
441 one of the mechanisms by which these TFs are involved in complex and diverse  
442 transcriptional activity (Toledo-Ortiz et al. 2003). We, therefore, can not exclude the



443 possibility that the gene encoding the plastidic NADP-ME from C<sub>3</sub> BEP *Brachypodium*  
444 *distachyon* (BRADI2g05620) can also be bound by ZmbHLH128 or ZmbHLH129  
445 despite none of the typical *cis*-elements recognised by bHLH being identified in the  
446 promoter. Given recent evidence indicating that the bHLH TF family is often recruited  
447 into C<sub>4</sub> photosynthesis regulation (Huang and Brutnell 2016), we suggest that the  
448 observed nucleotide modifications in the *cis*-element pair present in C<sub>4</sub>-NADP-ME  
449 promoters from *S. bicolor* and *Z. mays* may underlie changes in bHLH binding  
450 specificity *in vivo* and, therefore, contribute to the NADP-ME recruitment into C<sub>4</sub>  
451 photosynthesis in the Andropogoneae lineage from the PACMAD clade. The presence  
452 of a bHLH duplicate (ZmbHLH129) that seems not to be required for C<sub>4</sub> photosynthesis  
453 and has evolved to repress the activity of its homeolog (ZmbHLH128) is unique to  
454 maize as this homeolog gene pair resulted from the maize WGD. Therefore, we  
455 hypothesise that the single orthologous bHLH in all the other PACMAD species  
456 activates C<sub>4</sub>-NADP-ME gene expression. This agrees with the hypothesis that C<sub>4</sub>  
457 photosynthesis has on multiple occasions made use of *cis*-regulators found in C<sub>3</sub>  
458 species and, therefore, that the recruitment of C<sub>4</sub> genes was made through minor  
459 rewiring of pre-existing regulatory networks (Reyna-Llorens and Hibberd 2017). We  
460 conclude that regulation of C<sub>4</sub> genes can be based on an ancient code founded on a  
461 G-box present in the BEP clade as well as the PACMADs. Acquisition of a second *cis*-  
462 element recognised by bHLH in the PACMAD clade appears to have facilitated  
463 synergistic binding by either ZmbHLH128 or ZmbHLH129. Although this G-box-based  
464 *cis*-code has remained similar in *S. italica*, it has diverged in maize and sorghum.  
465 Thus, different C<sub>4</sub> grass lineages may employ slightly different molecular circuits to  
466 regulate orthologous C<sub>4</sub> photosynthesis genes.

## 467 **Materials and methods**

### 468 **Plant growth conditions and collection of leaf samples**

469 To construct the cDNA expression library, maize plants (*Zea mays* L. var. B73) were  
470 grown at 16h photoperiod with a light intensity of 340-350  $\mu\text{mol m}^{-2} \text{s}^{-1}$ , at day/night  
471 temperature of 28°C/26°C, and 70% relative humidity. Two light regimes were used:  
472 (1) nine days in 16h photoperiod; and (2) nine days in 16h photoperiod followed by a  
473 72h dark treatment. In both experiments, sample collection was performed under 16h  
474 photoperiod. Third leaves grown in the former and latter light regimes were harvested  
475 respectively at time points covering the Zeitgeber times (ZT) -0.5, 0.5, 2h, and ZT 1,  
476 2, 4, 8, 12, 15.5h. For isolation of maize mesophyll protoplasts, maize plants were  
477 grown for 10 days at 25°C, 16h photoperiod (60  $\mu\text{mol m}^{-2} \text{s}^{-1}$ ), and 70% relative  
478 humidity. For transient expression assays *in planta*, *Nicotiana benthamiana* (tobacco)  
479 plants were grown for five weeks at 22°C, 16h photoperiod (350  $\mu\text{mol m}^{-2} \text{s}^{-1}$ ), and  
480 65% relative humidity. After agro-infiltration of tobacco leaves, plants were left to grow  
481 into the same growth conditions and leaf discs (2.5 cm in diameter) collected 96h post-  
482 infection.

483

### 484 **Generation of yeast bait strains**

485 Yeast bait strains were generated as previously described (Ouwerkerk and Meijer  
486 2001; Serra et al. 2013). Yeast strain Y187 (Clontech) was used to generate six bait  
487 strains carrying overlapping fragments of the *ZmC<sub>4</sub>-NADP-ME* (GRMZM2G085019)  
488 promoter cloned into the yeast integrative vector pINT1-HIS3 (Ouwerkerk and Meijer  
489 2001) as *NotI-SpeI* or *XbaI-SpeI* fragments (supplementary table S1). The *ZmC<sub>4</sub>-*  
490 *NADP-ME* promoter region was defined as the 1982 bp upstream of the predicted  
491 translational start site (ATG). To assess self-activation/*HIS3* leaky expression, yeast  
492 bait strains were titrated in complete minimal medium (CM) lacking histidine, with  
493 increasing concentrations of 3-amino-1,2,4-triazole (3-AT, up to 75 mM).

494

### 495 **Construction of cDNA expression library**

496 Total RNA was extracted from third leaves of maize seedlings using TRIzol reagent  
497 (Invitrogen), following the manufacturer's instructions. RNA samples from nine time  
498 points (described in 'plant growth conditions and collection of leaf samples') were  
499 pooled in equal amounts for mRNA purification using the PolyAtract mRNA Isolation

500 System IV (Promega). A unidirectional cDNA expression library was prepared using  
501 the HybriZAP-2.1 XR cDNA Synthesis Kit and the HybriZAP-2.1 XR Library  
502 Construction Kit (Stratagene), following the manufacturer's instructions. Four  
503 micrograms of mRNA were used for first strand cDNA synthesis. After *in vivo* excision  
504 and amplification of the pAD-GAL4-2.1 phagemid vector, this maize cDNA expression  
505 library was used to transform yeast bait strains.

506

### 507 **Yeast One-Hybrid (Y1H) screening and validation**

508 Yeast bait strains were transformed with 1  $\mu$ g of maize cDNA expression library  
509 according to Ouwerkerk and Meijer (2001) and Serra et al. (2013). At least, 1.3 million  
510 yeast colonies of each yeast bait strain transformed with the maize cDNA expression  
511 library were screened in CM -HIS -LEU supplemented with 3-AT: 5 mM (-1982 to -  
512 1524 bp), 20 mM (-389 to -154 bp, -776 to -334 bp) or 75 mM (-973 to -702 bp, -1225  
513 to -891 bp, -1617 to -1135 bp). Plasmids from yeast clones that actively grew on  
514 selective medium were extracted. To know whether the isolated clones encoded  
515 transcription factors (TFs), the cDNA insert was sequenced and the results analysed  
516 using BLAST programmes. To validate DNA-TF interactions in yeast, isolated  
517 plasmids encoding TFs were re-transformed into the yeast bait strain in which they  
518 were found to bind. To assess TF binding specificity, plasmids encoding TFs were  
519 also transformed into the yeast bait strains to which they do not bind.

520

### 521 **Yeast cell spotting**

522 Yeast bait strains transformed with plasmids encoding TFs were grown overnight until  
523 log or mid-log phase at 30°C in liquid yeast CM medium supplemented with Histidine  
524 (CM +HIS -LEU). Cultures were normalized to an OD<sub>600</sub> of 0.4, spotted onto solid  
525 medium CM +HIS -LEU or CM -HIS -LEU + 3-AT, and grown for 3 days at 30°C.

526

### 527 **Isolation and transformation of maize mesophyll protoplasts**

528 Maize mesophyll protoplasts were isolated from 10-day-old maize greening plants and  
529 transformed according to Lourenço et al. (2013) with minor modifications. Mid-section  
530 of newly matured second leaves was digested in a cell wall digestive medium  
531 containing 1.5% (w/v) cellulase R-10 (Duchefa), 0.3% (w/v) macerozyme R-10  
532 (Duchefa), 10 mM MES (pH 5.7), 0.4 M mannitol, 1 mM CaCl<sub>2</sub>, 0.1% (w/v) BSA and 5

533 mM  $\beta$ -mercaptoethanol. Several leaf blades were stacked and cut perpendicularly to  
534 the long axis into 0.5 to 1 mm slices and quickly transferred to digestive medium (25  
535 mL digestive medium for each set of 10 leaf blades). Purity and integrity of isolated  
536 protoplasts were examined under light microscopy. Mesophyll protoplasts were  
537 quantified and its abundance adjusted to  $2 \times 10^6$  protoplasts/mL. Transformed  
538 protoplasts were resuspended in 1.25 mL of incubation solution (0.6 M mannitol, 4 mM  
539 MES (pH 5.7) and 4 mM KCl) and incubated in 24-well plates for 18h at room  
540 temperature under dark.

541

### 542 **Bimolecular Fluorescence Complementation (BiFC) assay**

543 To generate BiFC constructs, full-length coding sequences (CDS) of *ZmbHLH128*  
544 (GRMZM2G314882) and *ZmbHLH129* (GRMZM5G856837) were PCR-amplified  
545 using respectively the following pairs of *attB*-containing primers: 5'-  
546 GGGGACAAGTTTGTACAAAAAAGCAGGCTNNATGATGAACTGCGCCGGA-3' / 5'-  
547 GGGGACCACTTTGTACAAGAAAGCTGGGTNCTAAGCATTAGGCGGCCAG-3',  
548 and 5'-  
549 GGGGACAAGTTTGTACAAAAAAGCAGGCTNNATGATGGACTGCGCTGGA-3' / 5'-  
550 GGGGACCACTTTGTACAAGAAAGCTGGGTNCTAAGCATTGGGGGCCAG-3'  
551 (underlined sequences indicate *attB* Gateway adaptors). *ZmbHLH128* and  
552 *ZmbHLH129* CDS were recombined into pDONR221 (Invitrogen) to obtain Entry  
553 clones through BP-Gateway reaction (Invitrogen), following the manufacturer's  
554 instructions. CDS were then recombined into vectors YFP<sup>N</sup>43 and YFP<sup>C</sup>43 through  
555 LR-Gateway reaction (Invitrogen) to raise a translational fusion with N- and C-terminal  
556 domains of yellow fluorescent protein (YFP), respectively. Final BiFC constructs were  
557 denominated as YFP<sup>N</sup>::*ZmbHLH128*, YFP<sup>N</sup>::*ZmbHLH129*, YFP<sup>C</sup>::*ZmbHLH128*, and  
558 YFP<sup>C</sup>::*ZmbHLH129*. Maize mesophyll protoplasts were transformed with 6  $\mu$ g of each  
559 of the BiFC constructs. Protoplasts transformed with YFP<sup>N</sup>::Akin10 (*Arabidopsis* SNF1  
560 Kinase Homolog 10), YFP<sup>C</sup>:: Akin3 (*Arabidopsis* SNF1 Kinase Homolog 3) and  
561 YFP<sup>N</sup>43 and YFP<sup>C</sup>43 empty vectors were used as negative controls. Transformations  
562 were performed in triplicate. YFP fluorescence and chlorophyll autofluorescence  
563 signals were observed under a confocal microscope (Leica SP5).

564

### 565 **Transient expression assays *in planta***

566 For the transient expression assays in tobacco leaves, reporter and effector constructs  
567 were generated in the Gateway binary vectors pGWB3i (pGWB3 containing an intron-  
568 tagged  $\beta$ -glucuronidase (GUS) open reading frame (Berger et al. 2007)) and pGWB2  
569 (Tanaka et al. 2012), respectively.

570 To construct the reporter plasmids, promoter fragments of *ZmC<sub>4</sub>-NADP-ME*  
571 (GRMZM2G085019, from -389 to -154 bp) and *ZmnonC<sub>4</sub>-NADP-ME*  
572 (GRMZM2G122479, from -368 to -143 bp) were fused to a 136 bp minimal *CaMV35S*  
573 promoter (*m35S*) in a 3-step PCR reaction: (1) promoter sequences were amplified  
574 with long chimeric primers to introduce overlapping ends (reverse primer of *pZmC<sub>4</sub>-*  
575 *NADP-ME* / *pZmnonC<sub>4</sub>-NADP-ME* was designed to be complementary to the forward  
576 primer of the *m35S*) (supplementary table S4); (2) promoter sequences amplified by  
577 PCR in (1) were mixed according to the fusion products of interest in a ratio of 1:1  
578 (*ZmC<sub>4</sub>-NADP-ME* (-389 to -154 bp)::*m35S* and *ZmnonC<sub>4</sub>-NADP-ME*(-368 to -143  
579 bp)::*m35S*) and 10 PCR cycles were run without primers (denaturation at 98°C for 10  
580 s, 55°C for 30 s, and 72°C for 1 min); and (3) fusion products of interest were amplified  
581 with *attB*-containing primers (supplementary table S4). To obtain Entry clones,  
582 promoter fragments fused to *m35S* were cloned into pDONR221 (Invitrogen) through  
583 BP-Gateway reaction (Invitrogen), following the manufacturer's instructions. Promoter  
584 sequences were then recombined into the binary vector pGWB3i through LR-Gateway  
585 reaction (Invitrogen) to obtain the final reporter constructs for *promoter::GUS* analysis  
586 (*pZmC<sub>4</sub>-NADP-ME* and *pZmnonC<sub>4</sub>-NADP-ME*). For the effector constructs (TF driven  
587 by the *CaMV35S* promoter), *ZmbHLH128* and *ZmbHLH129* Entry clones previously  
588 generated (see BiFC assay) were directly recombined into the binary vector pGWB2  
589 through LR-Gateway reaction (Invitrogen).

590 Reporter and effector constructs together with a construct harbouring the silencing  
591 suppressor P1b (Valli et al. 2006) were transformed into the *Agrobacterium*  
592 *tumefaciens* strain GV301. Overnight cultures of *Agrobacterium* harbouring reporter,  
593 effector and P1b constructs were sedimented (5000 g for 15 min, at 4°C) and  
594 resuspended in infiltration medium (10 mM MgCl<sub>2</sub>, 10 mM MES (pH 5.6), 200  $\mu$ M  
595 acetosyringone) to an OD<sub>600</sub> of 0.3, 1, and 0.5, respectively, and mixed in a ratio of  
596 1:1:1. Mixed *Agrobacterium* cultures were incubated for 2h at 28°C and used to spot-  
597 infiltrate the abaxial side of 5-week-old tobacco leaves. As controls, tobacco leaves  
598 were agro-infiltrated with mixed cultures carrying the reporter construct alone or the

599 empty vector pGWB3i and effector constructs. Infected leaves were analysed at 96h  
600 post-infiltration. Leaf discs of 2.5 cm in diameter were collected from the infiltrated  
601 spots and used for the quantification of GUS activity. GUS activity was quantified by  
602 measuring the rate of 4-methylumbelliferyl- $\beta$ -D-glucuronide (MUG) conversion to 4-  
603 methylumbelliferone (MU) as described in Jefferson et al. (1987) and Williams et al.  
604 (2016). Briefly, soluble protein was extracted from agro-infiltrated tobacco leaf discs  
605 by freezing in liquid nitrogen and maceration, followed by addition of protein extraction  
606 buffer. Diluted protein extracts (1:2) were incubated with 1 mM MUG for 30, 60, 90  
607 and 120 min at 37°C in a 96-well plate. GUS activity was terminated at the end of each  
608 time point by the addition of 200 mM Na<sub>2</sub>CO<sub>3</sub> and MU fluorescence measured by  
609 exciting at 365 nm and measuring emission at 455 nm. The concentration of MU/unit  
610 fluorescence in each sample was interpolated using a concentration gradient of MU  
611 from 1.5 to 800  $\mu$ M MU.

612

### 613 **Production of recombinant ZmbHLH128 and ZmbHLH129**

614 *ZmbHLH128* and *ZmbHLH129* full-length CDS were PCR-amplified using,  
615 respectively, the following pairs of gene specific primers 5'-  
616 GAATTCATGATGAACTGCGCCGGA-3' / 5'-  
617 CTCGAGCTAAGCATTAGGCGGCCAG-3' and 5'-  
618 GAATTCATGATGGACTGCGCTGGA-3' / 5'-  
619 CTCGAGCTAAGCATTGGGGGCCAG-3' (underlined sequences indicate adaptors  
620 with restriction enzyme sites). *ZmbHLH128* and *ZmbHLH129* were cloned as *EcoRI*-  
621 *XhoI* fragments into the expression vector pET32a (Novagen), generating N-terminal  
622 Trx-tagged fusions. pET32a-Trx::*ZmbHLH128* and pET32a-Trx::*ZmbHLH129*  
623 constructs were confirmed by sequencing and transformed into Rosetta (DE3)pLysS  
624 competent cells (Invitrogen) for protein expression. Cells transformed with pET32a-  
625 Trx::*ZmbHLH128* and pET32a-Trx::*ZmbHLH129* constructs were respectively grown  
626 in Terrific Broth (TB) and Luria-Bertani (LB) medium to an OD<sub>600</sub> of 0.5. Protein  
627 expression was induced with 4 mM isopropyl-d-1-thiogalactopyranoside (IPTG) and  
628 allowed to occur for 3h (*ZmbHLH128*) or 5h (*ZmbHLH129*) at 30°C. Protein purification  
629 was performed as described in Cordeiro et al. (2016).

630



631 **Blue Native-Polyacrylamide gel electrophoresis (BN-PAGE) and western**  
632 **blotting**

633 Molecular mass of oligomers co-existing in purified ZmbHLH128 and ZmbHLH129  
634 recombinant proteins was determined by blue native polyacrylamide gel  
635 electrophoresis (BN-PAGE). Two micrograms of the recombinant proteins  
636 (Trx::His::ZmbHLH128 or Trx::His::ZmbHLH129) were resolved on a 3-12% Novex  
637 Bis-Tris NativePAGE mini gel (Life Technologies), following the manufacturer's  
638 instructions. HMW Native Marker Kit (66 - 669 kDa, GE Healthcare) was used to  
639 estimate molecular mass. Resolved proteins were transferred to a polyvinylidene  
640 difluoride (PVDF) membrane (GE Healthcare). The membrane was destained with a  
641 50% (v/v) methanol and 10% (v/v) acid acetic solution followed by pure methanol. For  
642 immunodetection of Trx::His::ZmbHLH128 and Trx::His::ZmbHLH129, the membrane  
643 was incubated with  $\alpha$ -His antibody (GE Healthcare) followed by  $\alpha$ -mouse horseradish  
644 peroxidase-conjugated antibody (abcam) for 1h each at room temperature.

645

646 **Electrophoretic Mobility Shift Assay (EMSA)**

647 DNA probes were generated by annealing oligonucleotide pairs in a thermocycler  
648 followed by radiolabeling as described in Serra et al. (2013). DNA probe sequences  
649 and respective annealing temperatures are listed in supplementary table S3. EMSAs  
650 were performed using 400 ng of the recombinant proteins Trx::ZmbHLH128 or  
651 Trx::ZmbHLH129, and 50 fmol of radiolabeled probes. Competition assays were  
652 performed adding 200- to 400-fold molar excess of the unlabeled probe. Trx::OsPIF14  
653 (LOC\_Os07g05010) and Trx protein, both purified by Cordeiro et al. (2016), were used  
654 as negative controls. Each protein was mixed with probes in a 10  $\mu$ l reaction containing  
655 10 mM HEPES (pH 7.9), 40 mM KCl, 1 mM EDTA (pH 8), 1 mM DTT, 50 ng herring  
656 sperm DNA, 15  $\mu$ g BSA and 10% (v/v) glycerol. Binding reactions were incubated for  
657 1h on ice and the bound complexes resolved on a native 5% polyacrylamide gel  
658 (37.5:1). Gel electrophoresis and detection of radioactive signal were performed as  
659 described in Serra et al. (2013).

660

661 **Synten analysis**

662 SynFind (Tang et al. 2015) was used to identify maize syntenic chromosomal regions  
663 for *ZmbHLH128* (GRMZM2G314882) and *ZmbHLH129* (GRMZM5G856837) genes



664 against *Z. mays* B73 RefGen\_v3 genome. A table containing maize syntelog gene  
665 pairs was retrieved using SynFind tool (supplementary table S2).

666

### 667 **Phylogenetic analyses**

668 *ZmbHLH128* and *ZmbHLH129* were used as references to identify closely related  
669 *bHLH* genes of *Zea mays*, *Sorghum bicolor*, *Setaria viridis*, *Setaria italica*, *Oryza*  
670 *sativa*, and *Brachypodium distachyon*, through Phytozome database (Goodstein et al.  
671 2012). Predicted CDS were aligned using MUSCLE. The resulting alignment was used  
672 to infer a maximum likelihood phylogenetic tree, using GTR+G+I nucleotide  
673 substitution model (1000 bootstrap pseudoreplicates) in MEGA 7 software (Kumar et  
674 al. 2016). Phylogenetic analysis of genes encoding C<sub>3</sub> and C<sub>4</sub> plastidic NADP-ME  
675 isoforms from *B. distachyon* (BRADI2g05620), *O. sativa* (LOC\_Os01g09320), *D.*  
676 *oligosanthes* (Do024386), *S. italica* (Si000645), *S. bicolor* (Sobic.003g036200,  
677 Sobic.009G108700) and *Z. mays* (GRMZM2G085019, GRMZM2G122479) was  
678 performed using Geneious Pro 5.3.6 software (Kearse et al. 2012). Full-length  
679 genomic sequences were aligned using MUSCLE. Phylogenetic tree was inferred  
680 using the Neighbor Joining (1000 bootstrap pseudoreplicates) and rooted using the  
681 gene encoding C<sub>3</sub> plastidic NADP-ME (At1g79750) from *Arabidopsis thaliana*, a dicot  
682 angiosperm.

683 **Figures**

684 **FIG. 1.**

**A**

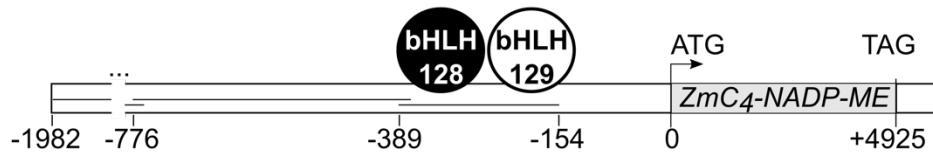

**B**

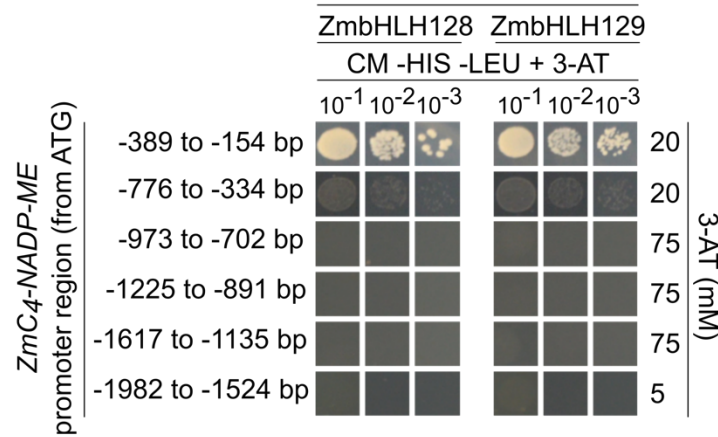

**C**

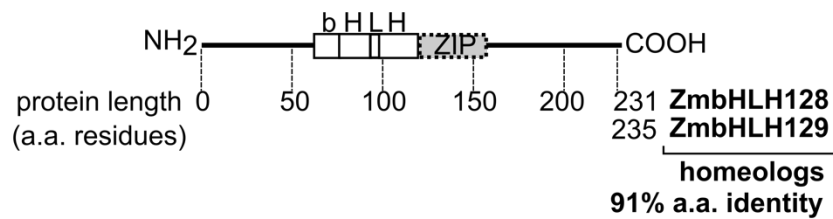

**D**

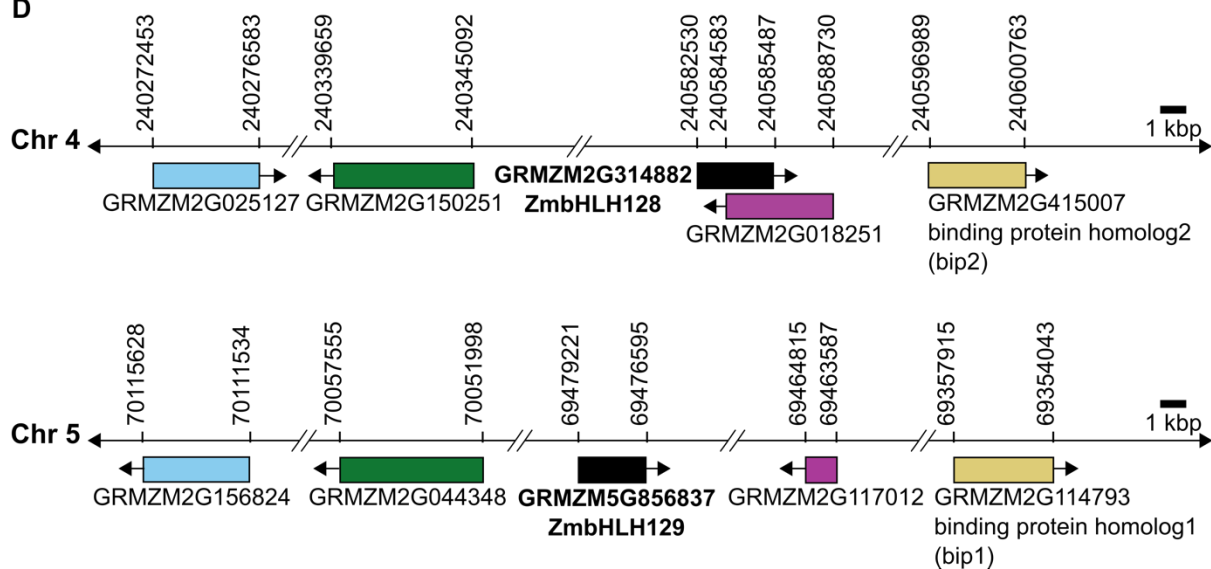

685

686 **FIG. 2.**

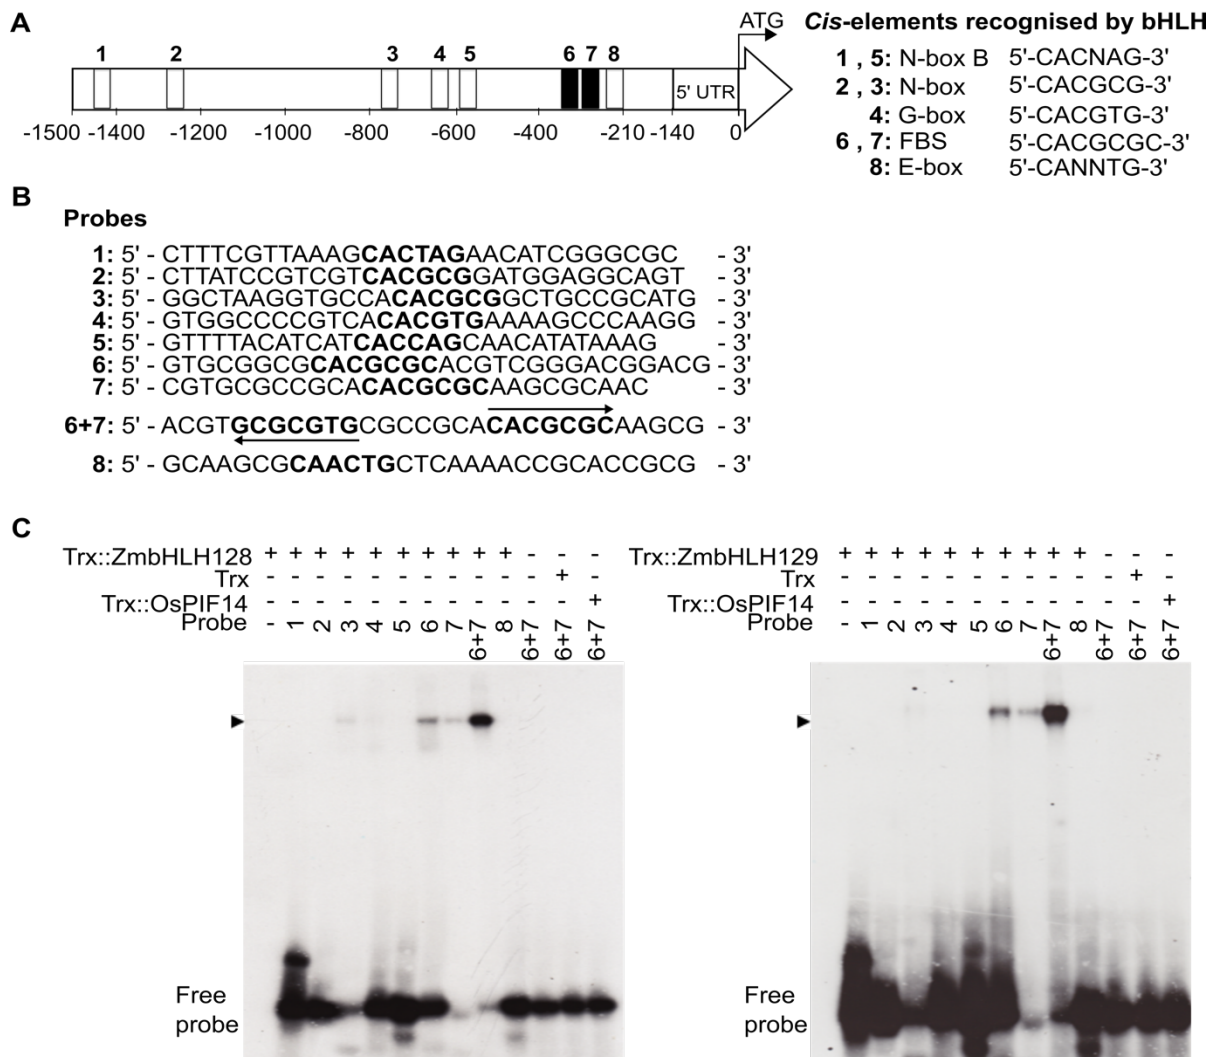

687

688 **FIG. 3.**

**A**

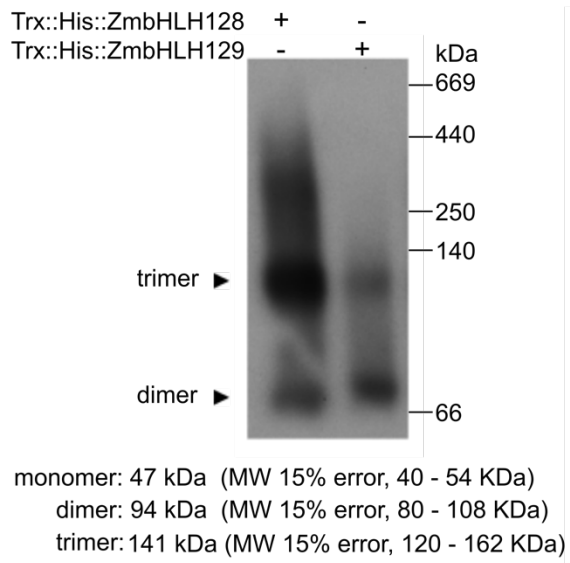

**B**

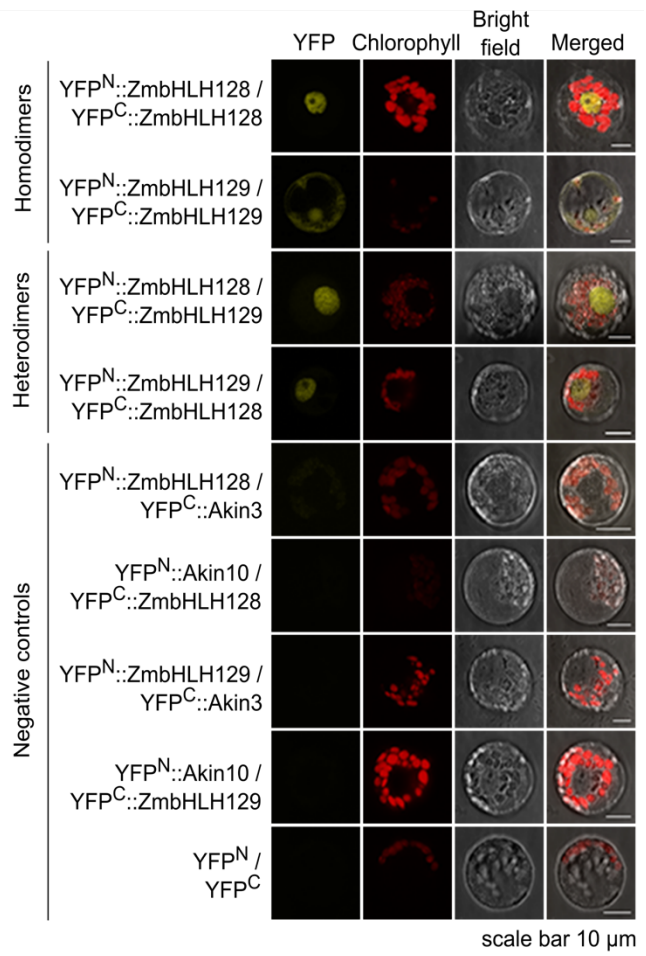

689

690 **FIG. 4.**

691

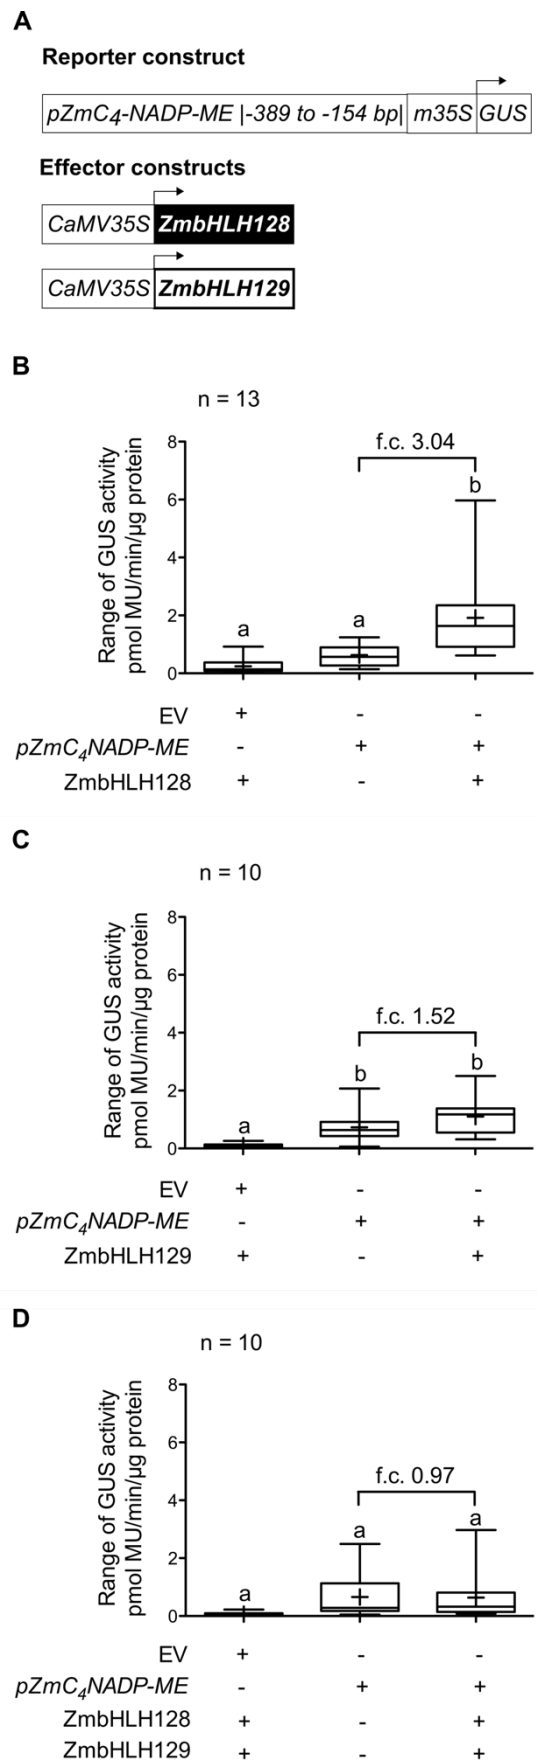

692 **FIG. 5.**

**A**

| NADP-ME | Species                | cis-element |                                                    | spacer | cis-element |                        | locus ID         | Coordinates (bp) |
|---------|------------------------|-------------|----------------------------------------------------|--------|-------------|------------------------|------------------|------------------|
|         |                        |             |                                                    |        |             |                        |                  |                  |
| I.      | <i>Z. mays</i>         | FBS 1       | 5'- <b>GCGCGT</b> Gcgccgc---a <b>CACGCGC</b> -3'   |        | FBS 2       | 5'- <b>CACGCGC</b> -3' | GRMZM2G085019    | -242 to -221     |
| II.     | <i>S. bicolor</i>      | FeRE1       | 5'- <b>ACGTGT</b> Gtgccgc---a <b>CACGCGC</b> G-3'  |        | N-box       |                        | Sobic.003g036200 | -237 to -218     |
| III.    | <i>S. italica</i>      | G-box       | 5'- <b>CCACGT</b> Gcgccgc-aca <b>CACGCGC</b> G-3'  |        | N-box       |                        | Si000645         | -212 to -181     |
| IV.     | <i>Z. mays</i>         | G-box       | 5'- <b>CACGT</b> Gcgccgc---a <b>CACGC</b> AC-3'    |        | N-box-like  |                        | GRMZM2G122479    | -196 to -178     |
| V.      | <i>S. bicolor</i>      | G-box       | 5'- <b>CCACGT</b> Gcgccgc---a <b>CACGCGC</b> G-3'  |        | N-box       |                        | Sobic.009g108700 | -231 to -212     |
| VI.     | <i>D. oligosanthos</i> | G-box       | 5'- <b>CACGT</b> Gcgccgc---a <b>CACGCGC</b> G-3'   |        | N-box       |                        | Do024386         | -355 to -336     |
| VII.    | <i>O. sativa</i>       | G-box       | 5'- <b>CCACGT</b> tgccgcgcca <b>CCC</b> TCCG-3'    |        |             |                        | LOC_Os01g09320   | -169 to -163     |
| VIII.   | <i>B. distachyon</i>   |             | 5'-CA <b>GCGT</b> Gcgccgcaaatca <b>CCGCGC</b> G-3' |        |             |                        | BRADI2g05620     | -292 to -278     |

**B**

| C4                           |                               |               | nonC4                      |                                         |                 | C3                                     |                               |                   |
|------------------------------|-------------------------------|---------------|----------------------------|-----------------------------------------|-----------------|----------------------------------------|-------------------------------|-------------------|
| NADP-ME                      | cis-element                   | Probe         | NADP-ME                    | cis-element                             | Probe           | NADP-ME                                | cis-element                   | Probe             |
| <i>Zea mays</i> (I)          | FBS 1<br>FBS 2<br>FBS1+FBS2   | 1<br>2<br>1+2 | <i>Zea mays</i> (IV)       | G-box<br>N-box-like<br>G-box+N-box-like | 7<br>8<br>7+8   | <i>Dichanthelium oligosanthos</i> (VI) | G-box<br>N-box<br>G-box+N-box | 11<br>12<br>11+12 |
| <i>Sorghum bicolor</i> (III) | FeRE1<br>N-box<br>FeRE1+N-box | 3<br>4<br>3+4 | <i>Sorghum bicolor</i> (V) | G-box<br>N-box<br>G-box+N-box           | 9<br>10<br>9+10 | <i>Oryza sativa</i> (VII)              | G-box<br>G-box > N-box        | 13<br>m13         |
| <i>Setaria italica</i> (III) | G-box<br>N-box<br>G-box+N-box | 5<br>6<br>5+6 |                            |                                         |                 |                                        |                               |                   |

**C**

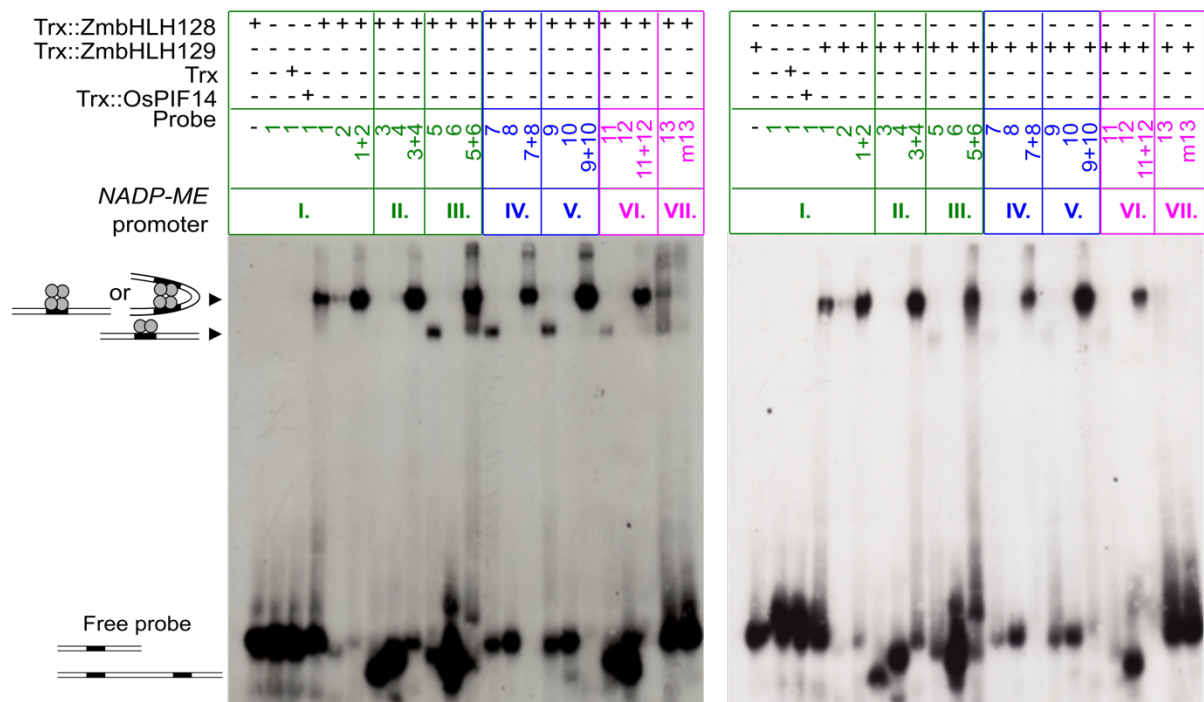

693





696 **Figure legends**

697 **FIG. 1.** ZmbHLH128 and ZmbHLH129 homeologs bind the *ZmC<sub>4</sub>-NADP-ME*  
698 promoter. (A) Schematic representation of the *ZmC<sub>4</sub>-NADP-ME* promoter, divided into  
699 fragments used as baits in Y1H screenings, and the ZmbHLH TFs identified. ATG and  
700 TAG are the translational start codon and the stop codon of the *ZmC<sub>4</sub>-NADP-ME* ORF,  
701 respectively. ZmbHLH position on the scheme indicates that they bind between the  
702 base pairs -389 and -154 in relation to the ATG. (B) Analysis of ZmbHLH-*pZmC<sub>4</sub>-*  
703 *NADP-ME* binding specificity. Each of the six yeast bait strains was transformed with  
704 both ZmbHLHs (pAD-GAL4-2.1::TF vectors) and positive interactions selected on CM  
705 -HIS -LEU + 3-AT (yeast Complete Minimal medium lacking histidine and leucine  
706 amino acids, and supplemented with 3-amino-1,2,4-triazole (3-AT), a competitive  
707 inhibitor of the *HIS3* gene product). (C) Schematic representation of basic Helix-Loop-  
708 Helix (bHLH) and leucine zipper (ZIP) protein domains, and respective position in  
709 protein sequences. (D) Schematic representation of *ZmbHLH128* and *ZmbHLH129*  
710 (black) and four additional maize homeolog gene pairs located in syntenic regions of  
711 chromosomes 4 and 5. Homeolog genes are indicated by colour. Arrows indicate  
712 direction of transcription of each gene. Genomic coordinates provided from the B73  
713 RefGen\_v3 assembly version.

714

715 **FIG. 2.** ZmbHLH128 and ZmbHLH129 bind two FBS *cis*-elements present in *ZmC<sub>4</sub>-*  
716 *NADP-ME* promoter. (A) Schematic representation of position and nucleotide  
717 sequence of eight *cis*-elements recognised by bHLH that were identified in the *ZmC<sub>4</sub>-*  
718 *NADP-ME* promoter. FBS stands for FHY3/FAR1 Binding Site and it is a N-box-  
719 containing motif. (B) EMSA probe sequences used to test *in vitro* binding affinity of  
720 ZmbHLH128 and ZmbHLH129 to *cis*-elements (highlighted in bold). Arrows indicate  
721 that the FBS *cis*-elements are present in opposite orientations. (C) EMSAs showing *in*  
722 *vitro* binding affinity of Trx::ZmbHLH128 (gel on the left) and Trx::ZmbHLH129 (gel on  
723 the right) to the radiolabeled probes described in (B). Arrowheads indicate uplifted  
724 ZmbHLH-DNA probe complexes. Free probe indicates unbound DNA probes.

725

726 **FIG. 3.** ZmbHLH128 and ZmbHLH129 form both homo- and heterodimers. (A)  
727 Western blot of BN-PAGE for the recombinant proteins Trx::His::ZmbHLH128 and  
728 Trx::His::ZmbHLH129. Gel was loaded with equivalent amount of protein.  
729 Recombinant proteins were immunodetected using  $\alpha$ -His antibody. MW indicates

730 molecular-weight size marker. (B) Protein interactions between ZmbHLH128 and  
731 ZmbHLH129 were tested by BiFC in maize mesophyll protoplasts co-transformed with  
732 constructs expressing ZmbHLH128 and ZmbHLH129 fused to N- and C-terminal YFP  
733 domains. YFP<sup>N</sup> and YFP<sup>C</sup> indicate split N- and C-terminal YFP domains, respectively.

734

735 **FIG. 4.** ZmbHLH129 impairs *trans*-activation of the *ZmC<sub>4</sub>-NADP-ME* promoter by  
736 ZmbHLH128. (A) Schematic representation of reporter and effector constructs used  
737 in transient expression assays in leaves of *Nicotiana benthamiana*. Reporter construct  
738 contains *GUS* gene driven by the minimal *CaMV35S* promoter (m35S) fused to  
739 *pZmC<sub>4</sub>-NADP-ME* (-389 to -154 bp). Effector constructs contain the *ZmbHLH128* or  
740 *ZmbHLH129* CDS driven by the full *CaMV35S* promoter. (B-D) Box plots (2.5 to 97.5  
741 percentiles) showing GUS activity, expressed in picomoles of the reaction product 4-  
742 methylumbelliferone (MU) generated per minute per microgram of protein, in leaves  
743 agro-infiltrated with reporter and the following effector constructs: (B) ZmbHLH128,  
744 (C) ZmbHLH129, and (D) ZmbHLH128 and ZmbHLH129. Different letters denote  
745 differences in experimental data that are statistically significant (One-way ANOVA,  
746 Tukey test,  $p \leq 0.05$ ,  $n = 10-13$ ). EV indicates pGWB3i empty vector (no promoter  
747 fragment cloned). Cross inside box plots indicates mean. f.c. indicates fold-change.

748

749 **FIG. 5.** The G-box-based *cis*-element pair recognised by ZmbHLH128 and  
750 ZmbHLH129 in *NADP-ME* promoters operates synergistically. (A) Sequence  
751 alignment of the two FBS *cis*-elements present in *ZmC<sub>4</sub>-NADP-ME* promoter against  
752 homologous *cis*-elements present in other promoters of genes encoding plastidic  
753 NADP-ME. C<sub>4</sub> grasses: *Zea mays*, *Sorghum bicolor* and *Setaria italica*; C<sub>3</sub> grasses:  
754 *Dichanthelium oligosanthes*, *Oryza sativa* and *Brachypodium distachyon*. Plastidic  
755 NADP-MEs are colour-coded: green for C<sub>4</sub>, blue for *non*C<sub>4</sub> and magenta for C<sub>3</sub>. *Cis*-  
756 elements are highlighted in bold and coloured according to the NADP-ME they belong  
757 to. FBS stands for FHY3/FAR1 Binding Site and FeRE1 for Iron Responsive Element  
758 1. (B) EMSA probes used to test *in vitro* binding affinity of ZmbHLH128 and  
759 ZmbHLH129 to each *cis*-element described in (A). Probe sequences are listed in  
760 supplementary table S3. (C) EMSA assays showing *in vitro* binding affinity of  
761 Trx::ZmbHLH128 (gel on the left) and Trx::ZmbHLH129 (gel on the right) proteins to  
762 the probes described in (B). Arrowheads indicate uplifted ZmbHLH-DNA probe  
763 complexes. Free probe indicates unbound DNA probes.

764

765 **FIG. 6.** Acquisition of N-box-derived *cis*-elements in *NADP-ME* promoters facilitates  
766 ZmbHLH128 and ZmbHLH129 binding in PACMAD grasses. (A) Phylogenetic tree of  
767 genes encoding plastidic NADP-ME from C<sub>3</sub> and C<sub>4</sub> grass species. C<sub>3</sub>: *Brachypodium*  
768 *distachyon* (Bd), *Oryza sativa* (Os) and *Dichanthelium oligosanthes* (Do); C<sub>4</sub>: *Setaria*  
769 *italica* (Si), *Sorghum bicolor* (Sb) and *Zea mays* (Zm). *NADP-MEs* are colour-coded:  
770 magenta for C<sub>3</sub>, blue for *non*C<sub>4</sub> and green for C<sub>4</sub>. *NADP-ME* genomic sequences were  
771 aligned using MUSCLE, and the phylogenetic tree inferred by NJ method (1000  
772 bootstrap pseudoreplicates, node numbers indicate bootstrap values). Gene encoding  
773 C<sub>3</sub> plastidic NADP-ME from *Arabidopsis thaliana* (AtC<sub>3</sub>-NADP-ME) was used as  
774 outgroup. (B) Diagram representing C<sub>3</sub> to C<sub>4</sub> molecular evolution of homologous bHLH  
775 binding *cis*-elements identified in promoters of genes encoding plastidic NADP-ME.  
776 Black and white circles represent ZmbHLH128 and ZmbHLH129 binding ability to  
777 *NADP-ME* gene promoters, respectively.

778 **Acknowledgments**

779 We thank Lisete Fernandes (Escola Superior de Tecnologia da Saúde de Lisboa,  
780 Portugal) for discussions and advice concerning EMSA experiments, Cecília Arraiano  
781 Lab (ITQB-NOVA, Oeiras, Portugal) for material used in EMSA experiments, Myriam  
782 Goudet and Samuel Brockington (Department of Plant Sciences, University of  
783 Cambridge, UK) for assistance with phylogenetic analyses. Fundação para a Ciência  
784 e Tecnologia (FCT) is acknowledged through research unit GREEN-it 'Bioresources  
785 for Sustainability' (UID/Multi/04551/2013). ARB (SFRH/BD/105739/2014), AG  
786 (SFRH/BD/89743/2012), AMC (SFRH/BD/74946/2010), PMB  
787 (SFRH/BPD/86742/2012), IAA (IF/00960/2013 – POPH-QREN), and NJMS  
788 (IF/01126/2012 – POPH-QREN) were funded by FCT, TSS and PG by European  
789 Union project *3to4* (Grant agreement no: 289582), and IR-L by BBSRC grant  
790 (BB/L014130).

791 **References**

- 792 Agrawal NJ, Radhakrishnan R, Purohit PK. 2008. Geometry of mediating protein  
793 affects the probability of loop formation in DNA. *Biophys. J.* 94:3150–3158.
- 794 Alvarez CE, Saigo M, Margarit E, Andreo CS, Drincovich MF. 2013. Kinetics and  
795 functional diversity among the five members of the NADP-malic enzyme family  
796 from *Zea mays*, a C<sub>4</sub> species. *Photosynth. Res.* 115:65–80.
- 797 Atchley WR, Terhalle W, Dress A. 1999. Positional dependence, cliques, and  
798 predictive motifs in the bHLH protein domain. *J. Mol. Evol.* 48:501–5016.
- 799 Berger B, Stracke R, Yatusевич R, Weisshaar B, Flügge UI, Gigolashvili T. 2007. A  
800 simplified method for the analysis of transcription factor-promoter interactions that  
801 allows high-throughput data generation. *Plant J.* 50:911–916.
- 802 Bowes G, Ogren WL, Hageman RH. 1971. Phosphoglycolate production catalyzed by  
803 ribulose diphosphate carboxylase. *Biochem. Biophys. Res. Commun.* 45:716–  
804 722.
- 805 Brown NJ, Newell CA, Stanley S, Chen JE, Perrin AJ, Kajala K, Hibberd JM. 2011.  
806 Independent and parallel recruitment of preexisting mechanisms underlying C<sub>4</sub>  
807 photosynthesis. *Science* 331:1436–1439.
- 808 Calvin BM, Massini P. 1952. The path of carbon in photosynthesis. *Experientia*  
809 VIII:445–457.
- 810 Christin P-A, Besnard G, Samaritani E, Duvall MR, Hodkinson TR, Savolainen V.  
811 2008. Report oligocene CO<sub>2</sub> decline promoted C<sub>4</sub> photosynthesis in grasses.  
812 *Curr. Biol.* 18:37–43.
- 813 Christin P-A, Boxall SF, Gregory R, Edwards EJ, Hartwell J, Osborne CP. 2013.  
814 Parallel recruitment of multiple genes into C<sub>4</sub> photosynthesis. *Genome Biol. Evol.*  
815 5:2174–2187.
- 816 Christin P-A, Osborne CP. 2014. The evolutionary ecology of C<sub>4</sub> plants. *New Phytol.*  
817 204:765–781.
- 818 Christin P-A, Osborne CP, Sage RF, Edwards EJ. 2011. C<sub>4</sub> eudicots are not younger  
819 than C<sub>4</sub> monocots. *J. Exp. Bot.* 62:3171–3181.
- 820 Cordeiro AM, Figueiredo DD, Tepperman J, Borba AR, Lourenço T, Abreu IA,  
821 Ouwerkerk PBF, Quail PH, Margarida Oliveira M, Saibo NJM. 2016. Rice  
822 phytochrome-interacting factor protein OsPIF14 represses *OsDREB1B* gene  
823 expression through an extended N-box and interacts preferentially with the active  
824 form of phytochrome B. *Biochim. Biophys. Acta* 1859:393–404.

- 825 De Masi F, Grove CA, Vedenko A, Alibés A, Gisselbrecht SS, Serrano L, Bulyk ML,  
826 Walhout AJM. 2011. Using a structural and logics systems approach to infer  
827 bHLH-DNA binding specificity determinants. *Nucleic Acids Res.* 39:4553–4563.
- 828 Ehleringer JR, Monson RK. 1993. Evolutionary and ecological aspects of  
829 photosynthetic pathway variation. *Annu. Rev. Ecol. Evol. Syst.* 24:411–439.
- 830 Emms DM, Covshoff S, Hibberd JM, Kelly S. 2016. Independent and parallel evolution  
831 of new genes by gene duplication in two origins of C<sub>4</sub> photosynthesis provides  
832 new insight into the mechanism of phloem loading in C<sub>4</sub> species. *Mol. Biol. Evol.*  
833 33:1796–1806.
- 834 Fisher A, Caudy M. 1998. The function of hairy-related bHLH repressor proteins in cell  
835 fate decisions. *BioEssays* 20:298–306.
- 836 Goodstein DM, Shu S, Howson R, Neupane R, Hayes RD, Fazo J, Mitros T, Dirks W,  
837 Hellsten U, Putnam N, Rokhsar DS . 2012. Phytozome: a comparative platform  
838 for green plant genomics. *Nucleic Acids Res.* 40:D1178–D1186.
- 839 Gordân R, Shen N, Dror I, Zhou T, Horton J, Rohs R, Bulyk ML. 2013. Genomic  
840 regions flanking E-box binding sites influence DNA binding specificity of bHLH  
841 transcription factors through DNA shape. *Cell Rep.* 3:1093–1104.
- 842 Gowik U, Burscheidt J, Akyildiz M, Schlue U, Koczor M, Streubel M, Westhoff P. 2004.  
843 *Cis*-regulatory elements for mesophyll-specific gene expression in the C<sub>4</sub> plant  
844 *Flaveria trinervia*, the promoter of the C<sub>4</sub> phosphoenolpyruvate carboxylase gene.  
845 *Plant Cell* 16:1077–1090.
- 846 Gowik U, Schulze S, Saladié M, Rolland V, Tanz SK, Westhoff P, Ludwig M. 2016. A  
847 MEM1-like motif directs mesophyll cell-specific expression of the gene encoding  
848 the C<sub>4</sub> carbonic anhydrase in *Flaveria*. *J. Exp. Bot.* 68:311–320.
- 849 Grass Phylogeny Working Group II. 2012. New grass phylogeny resolves deep  
850 evolutionary relationships and discovers C<sub>4</sub> origins. *New Phytol.* 193:304–312.
- 851 Grove CA, Masi F, Barrasa MI, Newburger DE, Alkema MJ, Bulyj ML, Walhout AJM.  
852 2009. A multiparameter network reveals extensive divergence between *C.*  
853 *elegans* bHLH transcription factors. *Cell* 138:314–327.
- 854 Haberlandt GFJ. 1904. Physiologische Pflanzenanatomie. Leipzig W. Engelmann.
- 855 Hatch MD. 1987. C<sub>4</sub> photosynthesis: a unique blend of modified biochemistry,  
856 anatomy and ultrastructure. *Biochim. Biophys. Acta* 895:81–106.
- 857 Hatch MD, Slack CR. 1966. Photosynthesis by sugar-cane leaves. A new  
858 carboxylation reaction and the pathway of sugar formation. *Biochem. J.* 101:103–



- 859 111.
- 860 Hibberd JM, Covshoff S. 2010. The regulation of gene expression required for C<sub>4</sub>  
861 photosynthesis. *Annu. Rev. Plant Biol.* 61:181–207.
- 862 Huang P, Brutnell TP. 2016. A synthesis of transcriptomic surveys to dissect the  
863 genetic basis of C<sub>4</sub> photosynthesis. *Curr. Opin. Plant Biol.* 31:91–99.
- 864 Jefferson RA, Kavanagh TA, Bevan MW. 1987. GUS fusions:  $\beta$ -glucuronidase as a  
865 sensitive and versatile gene fusion marker in higher plants. *EMBO J.* 6:3901–  
866 3907.
- 867 Kagawa T, Hatch MD. 1974. C<sub>4</sub>-acids as the source of carbon dioxide for Calvin cycle  
868 photosynthesis by bundle sheath cells of the C<sub>4</sub>-pathway species *Atriplex*  
869 *spongiosa*. *Biochem. Biophys. Res. Commun.* 59:1326–1332.
- 870 Kajala K, Brown NJ, Williams BP, Borrill P, Taylor LE, Hibberd JM. 2012. Multiple  
871 Arabidopsis genes primed for recruitment into C<sub>4</sub> photosynthesis. *Plant J.* 69:47–  
872 56.
- 873 Kang SG, Price J, Lin PC, Hong JC, Jang JC. 2010. The Arabidopsis bZIP1  
874 transcription factor is involved in sugar signaling, protein networking, and DNA  
875 binding. *Mol. Plant* 3:361–373.
- 876 Kearse M, Moir R, Wilson A, Stones-Havas S, Cheung M, Sturrock S, Buxton S,  
877 Cooper A, Markowitz S, Duran C, et al. 2012. Geneious Basic: an integrated and  
878 extendable desktop software platform for the organization and analysis of  
879 sequence data. *Bioinformatics* 28:1647–1649.
- 880 Kim JJ, Kang H, Park J, Kim W, Yoo J, Lee N, Kim JJ, Yoon T, Choi G. 2016. PIF1-  
881 interacting transcription factors and their binding sequence elements determine  
882 the *in vivo* targeting sites of PIF1. *Plant Cell* 28:1388–1405.
- 883 Ku MSB, Agarie S, Nomura M, Fukayama H, Tsuchida H, Ono K, Hirose S, Toki S,  
884 Miyao M, Matsuoka M. 1999. High-level expression of maize phosphoenol  
885 pyruvate carboxylase in transgenic rice plants. *Nat. Biotechnol.* 17:76–80.
- 886 Kumar S, Stecher G, Tamura K. 2016. MEGA7: Molecular Evolutionary Genetics  
887 Analysis Version 7.0 for bigger datasets. *Mol. Biol. Evol.* 33:1870–1874.
- 888 Langdale JA. 2011. C<sub>4</sub> cycles: past, present, and future research on C<sub>4</sub>  
889 photosynthesis. *Plant Cell* 23:3879–3892.
- 890 Li G, Siddiqui H, Teng Y, Lin R, Wan X, Li J, Lau O-S, Ouyang X, Dai M, Wan J, et al.  
891 2011. Coordinated transcriptional regulation underlying the circadian clock in



- 892 *Arabidopsis*. *Nat. Cell Biol.* 13:616–622.
- 893 Li X, Duan X, Jiang H, Sun Y, Tang Y, Yuan Z, Guo J. 2006. Genome-wide analysis  
894 of basic/helix-loop-helix transcription factor family in rice and *Arabidopsis*. *Plant*  
895 *Physiol.* 141:1167–1184.
- 896 Lin R, Ding L, Casola C, Ripoll DR, Feschotte C, Wang H. 2007. Transposase-derived  
897 transcription factors regulate light signaling in *Arabidopsis*. *Science* 318:1302–  
898 1305.
- 899 Lloyd J, Farquhar GD. 1994. <sup>13</sup>C discrimination during CO<sub>2</sub> assimilation by the  
900 terrestrial biosphere. *Oecologia* 99:201–215.
- 901 Lourenço T, Sapeta H, Figueiredo DD, Rodrigues M, Cordeiro A, Abreu IA, Saibo  
902 NJM, Oliveira MM. 2013. Isolation and characterization of rice (*Oryza sativa* L.)  
903 E3-ubiquitin ligase *OshOS1* gene in the modulation of cold stress response. *Plant*  
904 *Mol. Biol.* 83:351–363.
- 905 Lundgren MR, Christin P-A. 2016. Despite phylogenetic effects, C<sub>3</sub>–C<sub>4</sub> lineages bridge  
906 the ecological gap to C<sub>4</sub> photosynthesis. *J. Exp. Bot.* 68:241–254.
- 907 Maier A, Zell MB, Maurino VG. 2011. Malate decarboxylases: evolution and roles of  
908 NAD(P)-ME isoforms in species performing C<sub>4</sub> and C<sub>3</sub> photosynthesis. *J. Exp.*  
909 *Bot.* 62:3061–3069.
- 910 Martínez-García JF, Huq E, Quail PH. 2000. Direct targeting of light signals to a  
911 promoter element-bound transcription factor. *Science* 288:859–863.
- 912 Massari ME, Murre C. 2000. Helix-loop-helix proteins: regulators of transcription in  
913 eucaryotic organisms. *Mol. Cell. Biol.* 20:429–440.
- 914 Matsuoka M, Kozuka J, Shimamoto K, Kano-Murakami Y. 1994. The promoters of  
915 two carboxylases in a C<sub>4</sub> plant (maize) direct cell-specific, light-regulated  
916 expression in a C<sub>3</sub> plant (rice). *Plant J.* 6:311–319.
- 917 Maurino VG, Drincovich MF, Casati P, Andreo CS, Edwards GE, Ku MSB, Gupta SK,  
918 Franceschi V. 1997. NADP-malic enzyme: immunolocalization in different tissues  
919 of the C<sub>4</sub> plant maize and the C<sub>3</sub> plant wheat. *J. Exp. Bot.* 48:799–811.
- 920 Melzer R, Verelst W. 2009. The class E floral homeotic protein SEPALLATA3 is  
921 sufficient to loop DNA in “floral quartet”-like complexes *in vitro*. *Nucleic Acids Res.*  
922 37:144–157.
- 923 Murre C, McCaw PS, Baltimore D. 1989. A new DNA binding and dimerization motif  
924 in immunoglobulin enhancer binding, daughterless, MyoD, and myc proteins. *Cell*  
925 56:777–783.

- 926 Nomura M, Sentoku N, Nishimura A, Lin J, Honda C, Taniguchi M, Ishida Y, Ohta S,  
927 Komari T, Miyao-Tokutomi M, et al. 2000. The evolution of C<sub>4</sub> plants: acquisition  
928 of *cis*-regulatory sequences in the promoter of C<sub>4</sub>-type pyruvate, orthophosphate  
929 dikinase gene. *Plant J.* 22:211–221.
- 930 Ohsako S, Hyer J, Panganiban G, Oliver I, Caudy M. 1994. Hairy function as a DNA-  
931 binding helix-loop-helix repressor of *Drosophila* sensory organ formation. *Genes*  
932 *Dev.* 8:2743–2755.
- 933 Osborne CP, Beerling DJ. 2006. Nature's green revolution: the remarkable  
934 evolutionary rise of C<sub>4</sub> plants. *Phil. Trans. R. Soc. B.* 361:173–194.
- 935 Ouwkerk PB, Meijer AH. 2001. Yeast one-hybrid screening for DNA-protein  
936 interactions. In: DNA-Protein Interactions. *Current Protocols in Molecular Biology.*  
937 p. 12.12.1-12.12.22.
- 938 Patel M, Siegel AJ, Berry JO. 2006. Untranslated regions of *FbRbcS1* mRNA mediate  
939 bundle sheath cell-specific gene expression in leaves of a C<sub>4</sub> plant. *J. Biol. Chem.*  
940 281:25485–25491.
- 941 Penfield S, Rylott EL, Gilday AD, Graham S, Larson TR, Graham IA. 2004. Reserve  
942 mobilization in the Arabidopsis endosperm fuels hypocotyl elongation in the dark,  
943 is independent of abscisic acid, and requires *PHOSPHOENOLPYRUVATE*  
944 *CARBOXYKINASE1*. *Plant Cell* 16:2705–2718.
- 945 Rao X, Dixon RA. 2016. The differences between NAD-ME and NADP-ME subtypes  
946 of C<sub>4</sub> photosynthesis: more than decarboxylating enzymes. *Front. Plant Sci.*  
947 7:1525.
- 948 Reyna-Llorens I, Hibberd JM. 2017. Recruitment of pre-existing networks during the  
949 evolution of C<sub>4</sub> photosynthesis. *Phil. Trans. R. Soc. B.* 372:20160386.
- 950 Rohs R, West SM, Sosinsky A, Liu P, Mann RS, Honig B. 2009. The role of DNA  
951 shape in protein-DNA recognition. *Nature* 29:1248–1253.
- 952 Sage RF. 2004. The evolution of C<sub>4</sub> photosynthesis. *New Phytol.* 161:341–370.
- 953 Sage RF. 2016. A portrait of the C<sub>4</sub> photosynthetic family on the 50<sup>th</sup> anniversary of its  
954 discovery: species number, evolutionary lineages, and hall of fame. *J. Exp. Bot.*  
955 67:4039–4056.
- 956 Sage RF, Christin P-A, Edwards EJ. 2011. The C<sub>4</sub> plant lineages of planet Earth. *J.*  
957 *Exp. Bot.* 62:3155–3169.
- 958 Sasai Y, Kageyama R, Tagawa Y, Shigemoto R, Nakanishi S. 1992. Two mammalian  
959 helix-loop-helix factors structurally related to *Drosophila hairy* and *Enhancer of*

- 960 *split. Genes Dev.* 6:2620–2634.
- 961 Serra TS, Figueiredo DD, Cordeiro AM, Almeida DM, Lourenço T, Abreu IA, Sebastián  
962 A, Fernandes L, Contreras-Moreira B, Oliveira MM, et al. 2013. OsRMC, a  
963 negative regulator of salt stress response in rice, is regulated by two AP2/ERF  
964 transcription factors. *Plant Mol. Biol.* 82:439–455.
- 965 Sharkey TD. 1988. Estimating the rate of photorespiration in leaves. *Physiol. Plant.*  
966 73:147–152.
- 967 Smaczniak C, Immink RG, Muiño JM, Blanvillain R, Busscher M, Busscher-Lange J,  
968 Dinh QD, Liu S, Westphal AH, Boeren S, et al. 2012. Characterization of MADS-  
969 domain transcription factor complexes in *Arabidopsis* flower development. *Proc.*  
970 *Natl. Acad. Sci. U. S. A.* 109:1560–1565.
- 971 Smaczniak C, Muiño JM, Chen D, Angenent GC. 2017. Differences in DNA-binding  
972 specificity of floral homeotic protein complexes predict organ-specific target  
973 genes. *Plant Cell* doi:10.1105/tpc.17.00145.
- 974 Tanaka Y, Kimura T, Hikino K, Goto S, Nishimura M, Mano S, Nakagawa T. 2012.  
975 Gateway vectors for plant genetic engineering: overview of plant vectors,  
976 application for bimolecular fluorescence complementation (BiFC) and multigene  
977 construction. In: Barrera-Saldaña HA, editor. *Genetic Engineering - Basics, New*  
978 *Applications and Responsibilities.* p. 35–58.
- 979 Tang H, Bomhoff MD, Briones E, Zhang L, Schnable JC, Lyons E. 2015. SynFind:  
980 compiling syntenic regions across any set of genomes on demand. *Genome Biol.*  
981 *Evol.* 7:3286–3298.
- 982 Tausta SL, Coyle HM, Rothermel B, Stiefel V, Nelson T. 2002. Maize C<sub>4</sub> and non-C<sub>4</sub>  
983 NADP-dependent malic enzymes are encoded by distinct genes derived from a  
984 plastid-localized ancestor. *Plant Mol. Biol.* 50:635–652.
- 985 Taylor L, Nunes-Nesi A, Parsley K, Leiss A, Leach G, Coates S, Wingler A, Fernie AR,  
986 Hibberd JM. 2010. Cytosolic pyruvate, orthophosphate dikinase functions in  
987 nitrogen remobilization during leaf senescence and limits individual seed growth  
988 and nitrogen content. *Plant J.* 62:641–652.
- 989 Theissen G. 2001. Development of floral organ identity: stories from the MADS house.  
990 *Curr. Opin. Plant Biol.* 4:75–85.
- 991 Theissen G, Saedler H. 2001. Plant biology. Floral quartets. *Nature* 409:469–471.
- 992 Toledo-Ortiz G, Huq E, Quail PH. 2003. The *Arabidopsis* basic/helix-loop-helix  
993 transcription factor family. *Plant Cell* 15:1749–1770.

- 994 Valli A, Martin-Hernandez AM, Lopez-Moya JJ, Garcia JA. 2006. RNA silencing  
995 suppression by a second copy of the P1 serine protease of *Cucumber vein*  
996 *yellowing ipomovirus*, a member of the family *Potyviridae* that lacks the cysteine  
997 protease HCPro. *J. Virol.* 80:10055–10063.
- 998 Vicentini A, Barber JC, Aliscioni SS, Giussani LM, Kellog EA. 2008. The age of the  
999 grasses and clusters of origins of C<sub>4</sub> photosynthesis. *Glob. Chang. Biol.* 14:2963–  
1000 2977.
- 1001 Wang L, Czedik-Eysenberg A, Mertz RA, Si Y, Tohge T, Nunes-Nesi A, Arrivault S,  
1002 Dedow LK, Bryant DW, Zhou W, et al. 2014. Comparative analyses of C<sub>4</sub> and C<sub>3</sub>  
1003 photosynthesis in developing leaves of maize and rice. *Nat. Biotechnol.* 32:1158–  
1004 1165.
- 1005 Wang Y, Bräutigam A, Weber APM, Zhu X-G. 2014. Three distinct biochemical  
1006 subtypes of C<sub>4</sub> photosynthesis? A modelling analysis. *J. Exp. Bot.* 65:3567–3578.
- 1007 Williams BP, Aubry S, Hibberd JM. 2012. Molecular evolution of genes recruited into  
1008 C<sub>4</sub> photosynthesis. *Trends Plant Sci.* 17:213–220.
- 1009 Williams BP, Burgess SJ, Reyna-Llorens I, Knerova J, Aubry S, Stanley S, Hibberd  
1010 JM. 2016. An untranslated *cis*-element regulates the accumulation of multiple C<sub>4</sub>  
1011 enzymes in *Gynandropsis gynandra* mesophyll cells. *Plant Cell* 28:454–465.
- 1012 Yanagisawa S, Sheen J. 1998. Involvement of maize Dof zinc finger proteins in tissue-  
1013 specific and light-regulated gene expression. *Plant Cell* 10:75–89.
